# Supplementary material for: A solvent-free mechanochemical synthesis of polyaromatic hydrocarbon derivatives
Source: Royal Society of Chemistry journal article supplement (doi:10.1039/c9ra04921e), 2019-01-01
Supplement: c9ra04921e1.pdf [file c9ra04921e1.pdf]

# A solvent-free mechanochemical synthesis of polyaromatic hydrocarbon derivatives

**Cong Wang, Malik Hill, James Mack**

Department of Chemistry, University of Cincinnati, 301 Clifton Court, Cincinnati, Ohio 45221-0172, United states

## **Supporting Information**

### **Table of contents**

|                            |     |
|----------------------------|-----|
| General information.....   | S2  |
| Experimental.....          | S2  |
| Optimization study.....    | S5  |
| Spectra.....               | S8  |
| Eco Scale Calculation..... | S29 |
| Reference.....             | S43 |

## General information

All NMR spectra were recorded on a Bruker Avance 400 spectrometer. Deuterated NMR solvents were obtained from Cambridge Isotope Laboratories, Inc., and used without further purification. For high resolution MS data, sample was analyzed by using an Orbitrap Fusion Lumos Mass Spectrometer for high resolution data. GC-MS data was obtained from Agilent Technologies 7890B GC system and 5977A MSD. All chemicals were purchased from Acros Organics and used without further purification. Mechanochemistry was carried out in an 8000 M Spex Certiprep Mixer/Mill. And all the reactions were conducted at 18Hz. Reaction vials (Smartsnap grinding jar) were purchased from Form-Tech Scientific. Ball bearings were purchased from Small Parts incorporated. ~1g for one 1/4" stainless steel ball (S.S. ball). Flash column system (CombiFlash Rf+) was purchased from Teledyne ISCO.

## Experimental

Naphthalene-2,3-dicarboxylic acid diethyl ester (CAS No. 50919-54-5)

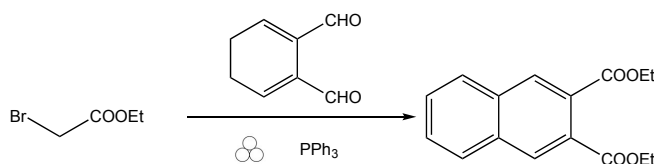

1.57g (6mmol, 1.2eq.) PPh<sub>3</sub> 2.17g (13mmol, 2.6eq.) ethyl bromoacetate 3.6g (26mmol, 5.2eq.) K<sub>2</sub>CO<sub>3</sub> was put in a 30ml milling vial with 25 1/4" S.S. balls (total weight is 26.748g). The vial was placed in an 8000 M Spex Certiprep mixer/mill and the contents were ball milled for 4h. Wait until vial get cool down to room temperature. Open the vial carefully. 0.56g (5mmol, 1eq.) 1,2-Phthalic dicarboxaldehyde was put into the vial. The vial was placed in the mill and the contents were ball milled for 16h, 18Hz. After it is done, 3 portions ethyl acetate (10ml for each portion) was used to remove the mixture from the vial. Then, gravity filtration was used to remove the solid. Solution was collected and silica gel was added and solvent was removed under reduced pressure. The resulting mixture was purified by flash column chromatography on silica gel (EtOAc:Heptane=1:9). White to pale yellow solid was obtained. Yield 84%.

<sup>1</sup>H NMR (CDCl<sub>3</sub>, 400 MHz, ppm): δ 1.39 (t, 6H), 4.41 (q, 4H), 7.56-7.59 (m, 2H), 7.87-7.89 (m, 2H), 8.23 (s, 2H) 2H); <sup>13</sup>C NMR (CDCl<sub>3</sub>, 400 MHz, ppm): δ 14.19, 61.64, 128.45, 128.59, 128.84, 129.99, 133.33, 167.73; High Resolution MS (HRMS, ESI-MS). (M+H<sup>+</sup>), (C<sub>16</sub>H<sub>16</sub>O<sub>4</sub>)H<sup>+</sup>, Calc: 273.1121; Found: 273.1120. Spectrum data match with previous report.<sup>1</sup> Melting point 54-55°C (lit.<sup>2</sup> mp 54-55°C).

(3-Hydroxymethyl-naphthalen-2-yl)-methanol (CAS No. 31554-15-1)

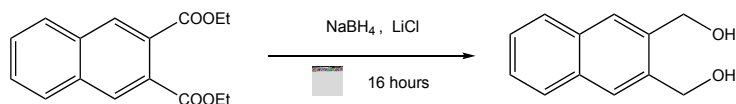

0.81g (3mmol, 1eq.) Naphthalene-2,3-dicarboxylic acid diethyl ester, 0.45g (12mmol, 4eq.) NaBH<sub>4</sub>, 1.3g (30mmol, 10eq.) LiCl was put in a 15ml milling jar with 7 1/4" stainless balls. The vial was placed in an 8000 M Spex Certiprep mixer/mill and the contents were ball milled for 16h. The mixture was removed into a 250ml beaker and quenched with ~10% HCl (~75ml) and extracted with 3 portions of ethyl acetate (50ml for each portion). The resulting solution was dried with MgSO<sub>4</sub> and solvent was removed under reduced pressure and further purified by flash column chromatography on silica gel (EtOAc:Heptane=8:2). White solid was obtained. Yield 75%.

<sup>1</sup>H NMR (Acetone-d<sub>6</sub>, 400 MHz, ppm): δ 4.87 (d, 4H), 7.47-7.49 (m, 2H), 7.87-7.89 (m, 2H), 7.91 (s, 2H); <sup>13</sup>C NMR (Acetone-d<sub>6</sub>, 400 MHz, ppm): δ 63.05, 126.59, 127.19, 128.34, 133.77, 139.13; HRMS. (M+Na<sup>+</sup>), (C<sub>12</sub>H<sub>12</sub>O<sub>2</sub>)Na<sup>+</sup>, Calc: 211.0730; Found: 211.0731. Spectrum data match with previous report.<sup>1</sup> Melting point 157-162 °C (lit.<sup>3</sup> mp 155-160 °C).

Naphthalene-2,3-dicarbaldehyde (CAS No. 7149-49-7)

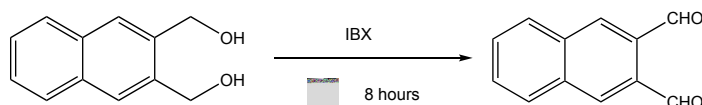

0.33g (1.8mmol, 1eq.) (3-Hydroxymethyl-naphthalen-2-yl)-methanol, 1.5g (5.4mmol, 3eq.) IBX (2-Iodoxybenzoic acid, prepared and recycled in our lab by following the previously reported protocol<sup>4</sup>) was put in a 15ml milling jar with 3 1/4" stainless balls. The vial was placed in an 8000 M Spex Certiprep mixer/mill and the contents were ball milled for 8h. EtOAc (3 portions, 5ml for each portion) was added into the vial. Gravity filtration was used to remove the solid and solution was collected and further purified by flash column chromatography on silica gel (EtOAc:Heptane=4:6). White solid was obtained. Yield 81%.

<sup>1</sup>H NMR (CDCl<sub>3</sub>, 400 MHz, ppm): δ 7.72-7.74 (m, 2H), 8.02-8.05 (m, 2H), 8.42 (s, 2H), 10.61 (s, 2H). <sup>13</sup>C NMR (CDCl<sub>3</sub>, 400 MHz, ppm): δ 129.66, 130.03, 132.84, 134.44, 134.49, 192.52. Spectrum data match with previous report.<sup>1</sup> GC-MS, m/z, 184, [M<sup>+</sup>]. Melting point 128-129 °C (lit.<sup>5</sup> mp 112-115 °C).

Anthracene-2,3-dicarboxylic acid diethyl ester (CAS No. 84041-04-3)

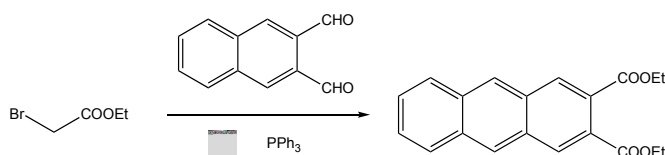

0.78g (3mmol, 1.2eq.) PPh<sub>3</sub> 1.1g (6.5mmol, 2.6eq.) ethyl bromoacetate 1.8g (13mmol, 5.2eq.)

K<sub>2</sub>CO<sub>3</sub> was put in a 30ml milling jar with 25 1/4" stainless balls. The vial was placed in an 8000 M Spex Certiprep mixer/mill and the contents were ball milled for 4h. Wait until vial get cool down to room temperature. Open the vial carefully. 0.46g (2.5mmol, 1eq.) Naphthalene-2,3-dicarbaldehyde was put into the vial. The vial was placed in the mill and the contents were ball milled for 16h. After it is done, ethyl acetate (3 portions, 10ml for each portion) was used to remove the mixture from the vial. Then gravity filtration was used to remove the solid. Solution was collected and Si gel was added and solvent was removed under reduced pressure. The resulting mixture was purified by flash column chromatography on silica gel (Acetone:Heptane=1:9). Bright yellow solid was obtained. Yield 62%.

<sup>1</sup>H NMR (CDCl<sub>3</sub>, 400 MHz, ppm): δ 1.43 (t, 6H), 4.44 (q, 4H), 7.55-7.57 (m, 2H), 8.04-8.06 (m, 2H), 8.44 (s, 2H), 8.52 (s, 2H). <sup>13</sup>C NMR (CDCl<sub>3</sub>, 400 MHz, ppm): δ 14.25, 61.66, 126.79, 127.94, 128.00, 138.42, 130.49, 131.14, 133.06, 167.78. Spectrum data match with previous report.<sup>1</sup> GC-MS, m/z, 322, [M<sup>+</sup>]. Melting point 86-87°C (lit.<sup>2</sup> mp 99-100°C).

(3-Hydroxymethyl-anthracen-2-yl)-methanol (CAS No. 1134642-63-9)

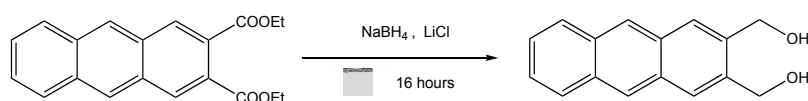

0.322g (1mmol, 1eq.) Anthracene-2,3-dicarboxylic acid diethyl ester, 0.15g (4mmol, 4eq.) NaBH<sub>4</sub>, 0.424g (10mmol, 10eq.) LiCl was put in a 15ml milling jar with 7 1/4" stainless balls. The vial was placed in an 8000 M Spex Certiprep mixer/mill and the contents were ball milled for 16h. The mixture was removed into a 250ml beaker and quenched with ~10% HCl (~75ml). Vacuum filtration was used and the solid was washed with acetone 3 times (5ml each time). Keep the vacuum on until it is dry. Gray solid was obtained. Yield 55%.

<sup>1</sup>H NMR (DMSO-d<sub>6</sub>, 400 MHz, ppm): δ 4.74-4.75 (d, 4H), 5.31-5.33 (t, 2H), 7.48-7.50 (m, 2H), 8.04 (s, 2H), 8.06-8.08 (m, 2H), 8.53 (s, 2H) <sup>13</sup>C NMR (DMSO-d<sub>6</sub>, 400 MHz, ppm): δ 60.68, 124.56, 125.14, 125.29, 127.90, 130.48, 131.07, 138.16. Spectrum data match with previous report.<sup>1</sup> HRMS, (M+Na<sup>+</sup>), (C<sub>16</sub>H<sub>14</sub>O<sub>2</sub>)Na<sup>+</sup> Calc: 261.0886; Found: 261.0887. Melting point 234-245°C.

Anhracene-2,3-dicarbaldehyde (CAS No.76197-35-8)

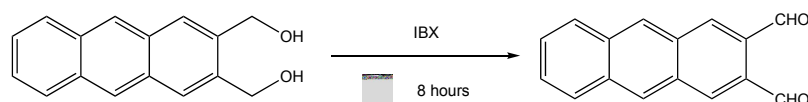

0.23g (1mmol, 1eq.) (3-Hydroxymethyl-anthracen-2-yl)-methanol, 0.84g (3mmol, 3eq.) IBX and ~0.5g silica gel was put in a 15ml milling jar with 3 1/4" stainless balls. The vial was placed in an 8000 M Spex Certiprep mixer/mill and the contents were ball milled for 8h. Acetone (3 portions, 20ml for each portion) was used to remove the mixture form vial. Then gravity

filtration was used to remove solid. Filtrate was collected and dried under reduced pressure. The solid was heated in sublime apparatus at 100°C. The dark orange solid left on the bottom in sublime apparatus was collected. Yield 81%.

<sup>1</sup>H NMR (CDCl<sub>3</sub>, 400 MHz, ppm): δ 7.64-7.66 (m, 2H), 8.10-8.12 (m, 2H), 8.63 (s, 2H), 8.65 (s, 2H), 10.66 (s, 2H). <sup>13</sup>C NMR (CDCl<sub>3</sub>, 400 MHz, ppm): δ 127.79, 128.67, 129.58, 130.93, 132.04, 133.82, 136.48, 192.48. GCMS Spectrum data match with previous report.<sup>1</sup> GC-MS, m/z, 234, [M<sup>+</sup>]. Melting point 197-201°C (lit.<sup>6</sup> mp 217°C).

#### Naphthacene-2,3-dicarboxylic acid diethyl ester

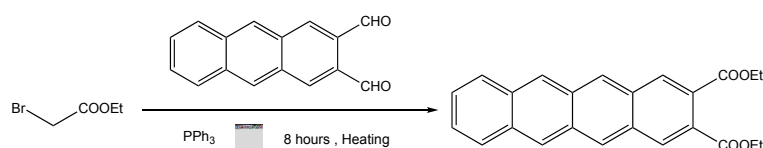

0.157g (0.6mmol, 1.2eq.) PPh<sub>3</sub> 0.212g (1.3mmol, 2.6eq.) ethyl bromoacetate 0.36g (2.6mmol, 5.2eq.) K<sub>2</sub>CO<sub>3</sub> was put in a 15ml milling jar with 10 1/4" stainless balls. The vial was placed in an 8000 M Spex Certiprep mixer/mill and the contents were ball milled for 4h. Wait until vial get cool down to room temperature. Open the vial carefully. 0.117g (0.5mmol, 1eq.) Anhracene-2,3-dicarbaldehyde was put into the vial. The vial was placed in the mill with the heating apparatus that reported previously in our group<sup>7</sup> and the contents were ball milled and heated at 80°C for 8h. After it is done, ethyl acetate (3 portions, 10ml for each portion) was used to remove the mixture from the vial. Gravity filtration was used to remove the solid. Solution was collected and silica gel was added and solvent was removed under reduced pressure. The resulting mixture was purified by flash column chromatography on silica gel (Acetone:Heptane=1:9). Bright orange solid was obtained. Yield 20%.

<sup>1</sup>H NMR (CDCl<sub>3</sub>, 400 MHz, ppm): δ 1.44 (t, J = 7.1 Hz, 6H), 4.44 (q, J = 7.2 Hz, 4H), 7.45-7.48 (m, 2H), 8.02-8.04 (m, 2H), 8.43 (s, 2H), 8.71 (s, 2H), 8.75 (s, 2H). <sup>13</sup>C NMR (CDCl<sub>3</sub>, 400 MHz, ppm): δ 14.26, 61.62, 126.03, 126.99, 127.66, 128.34, 128.56, 129.86, 131.02, 131.68, 132.27, 167.72. Spectrum data match with previous report.<sup>1</sup> HRMS. (M+Na<sup>+</sup>), (C<sub>24</sub>H<sub>20</sub>O<sub>4</sub>)Na<sup>+</sup>, Calc: 395.12538; Found: 395.12541. Melting point 183-186°C.

#### Optimization study

Control reaction was conducted to find the condition for wittig reaction. Different Stainless steel (S.S.) ball and time length were used.

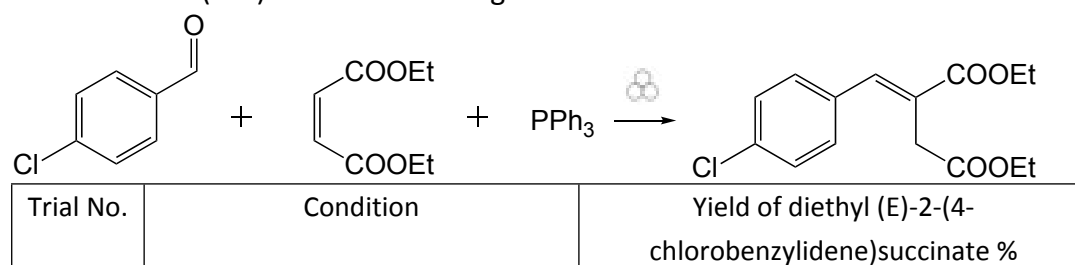

|   |                                    |    |
|---|------------------------------------|----|
| 1 | 1 h, one 3/16-inch SS ball         | 4  |
| 2 | 16 h, one 3/16-inch SS ball        | 21 |
| 3 | 1 h, three 3/16-inch SS ball       | 7  |
| 4 | 16 h, one 3/16-inch SS ball, LiBr  | 7  |
| 5 | 16 h, nine 3/16-inch SS ball, LiBr | 12 |

Different nucleophilic reagent was used to see if it works better with maleic anhydride. (:Nu = nucleophilic reagent)

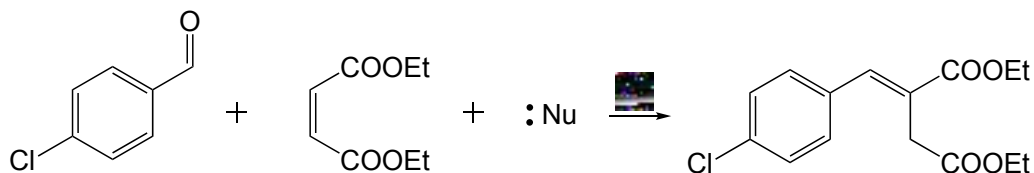

| Trial No. | Condition                  | :Nu                    | Result                       |
|-----------|----------------------------|------------------------|------------------------------|
| 1         | 16 h, one 3/16-inch SS bal | Tricyclohexylphosphine | No reaction                  |
| 2         | 16 h, one 3/16-inch SS bal | DABCO                  | No reaction                  |
| 3         | 16 h, one 3/16-inch SS bal | NaH                    | inseparable multiple product |

Optimization for wittig reaction.

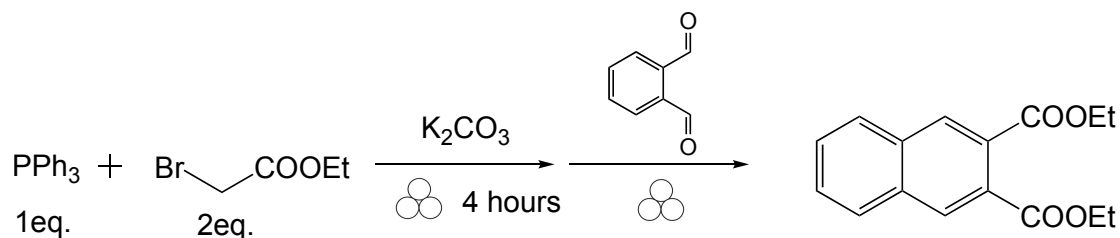

| Trial No. | Condition                                               | Yield % |
|-----------|---------------------------------------------------------|---------|
| 1         | one 3/16-inch S.S. balls, 4hours, 15ml milling vial     | 19      |
| 2         | one 1/4-inch S.S. balls, 4hours, 15ml milling vial      | 29      |
| 3         | Fifteen 3/16-inch S.S. balls, 4hours, 15ml milling vial | 51      |
| 4         | 25 1/4-inch S.S. balls, 16hours, 30ml milling vial      | 84      |

Optimization for IBX oxidation generating Anhracene-2,3-dicarbaldehyde

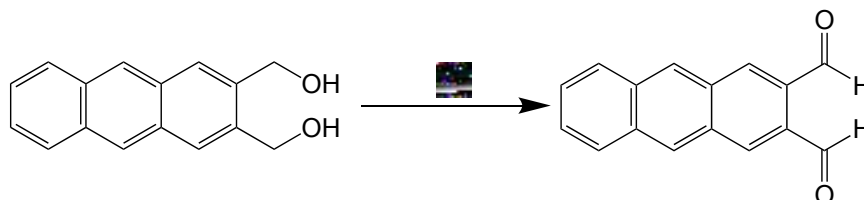

| Trial No. | Condition                  | Yield % |
|-----------|----------------------------|---------|
| 1         | 3eq. IBX                   | 8       |
| 2         | 6eq. IBX                   | 11      |
| 3         | 3eq. IBX , 1ml EtOAc       | 8       |
| 4         | 3eq. IBX , Heating(~100°C) | 10      |

|   |                            |    |
|---|----------------------------|----|
| 5 | 2.6eq. Dess-Martin reagent | 13 |
| 6 | 3eq. IBX , 0.5g Silica gel | 81 |

Optimization for wittig reaction generating Naphthacene-2,3-dicarboxylic acid diethyl ester

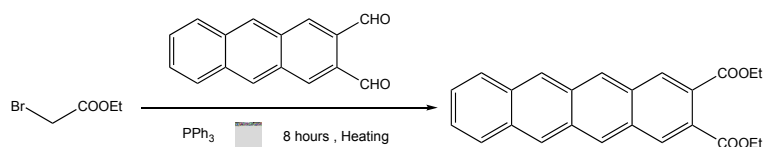

| Trial No. | Condition                                           | Yield |
|-----------|-----------------------------------------------------|-------|
| 1         | 25 1/4" S.S. balls, 16h                             | 13%   |
| 2         | 25 1/4" S.S. balls, 16h, Ball mill with cooling fan | 0%    |
| 3         | 25 1/4" S.S. balls, 16h, ~0.5g dry silica gel       | 8%    |
| 4         | 25 1/4" S.S. balls, 8h, heating ~80°C               | 20%   |

No optimization for other steps.

$^1\text{H-NMR}$  of Naphthalene-2,3-dicarboxylic acid diethyl ester

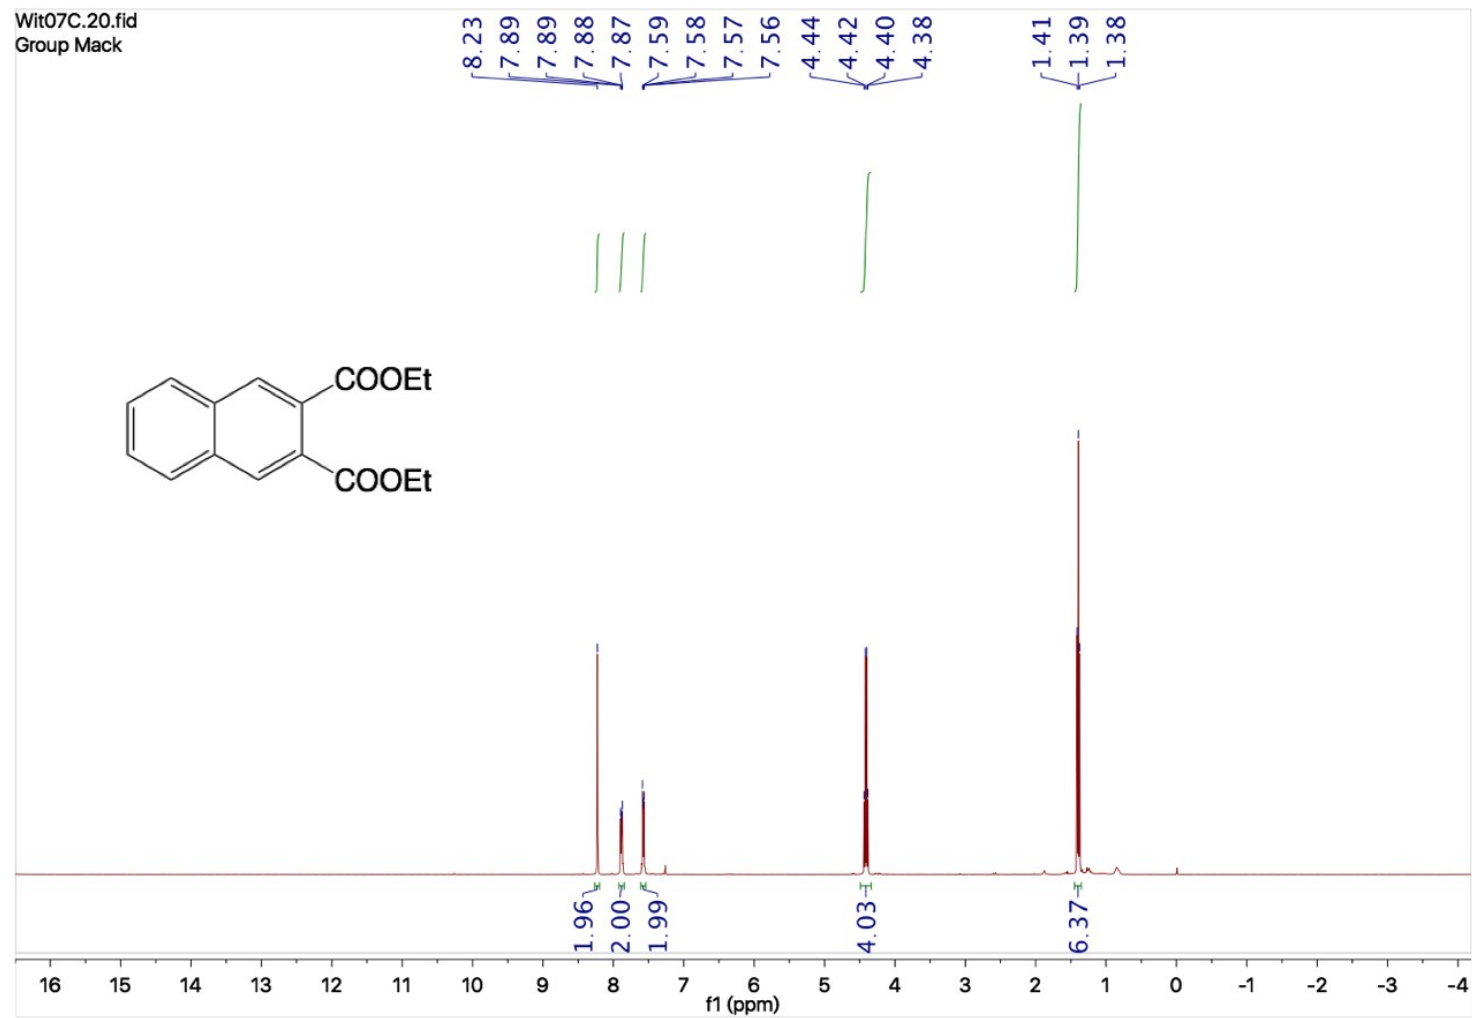



$^{13}\text{C}$ -NMR of Naphthalene-2,3-dicarboxylic acid diethyl ester

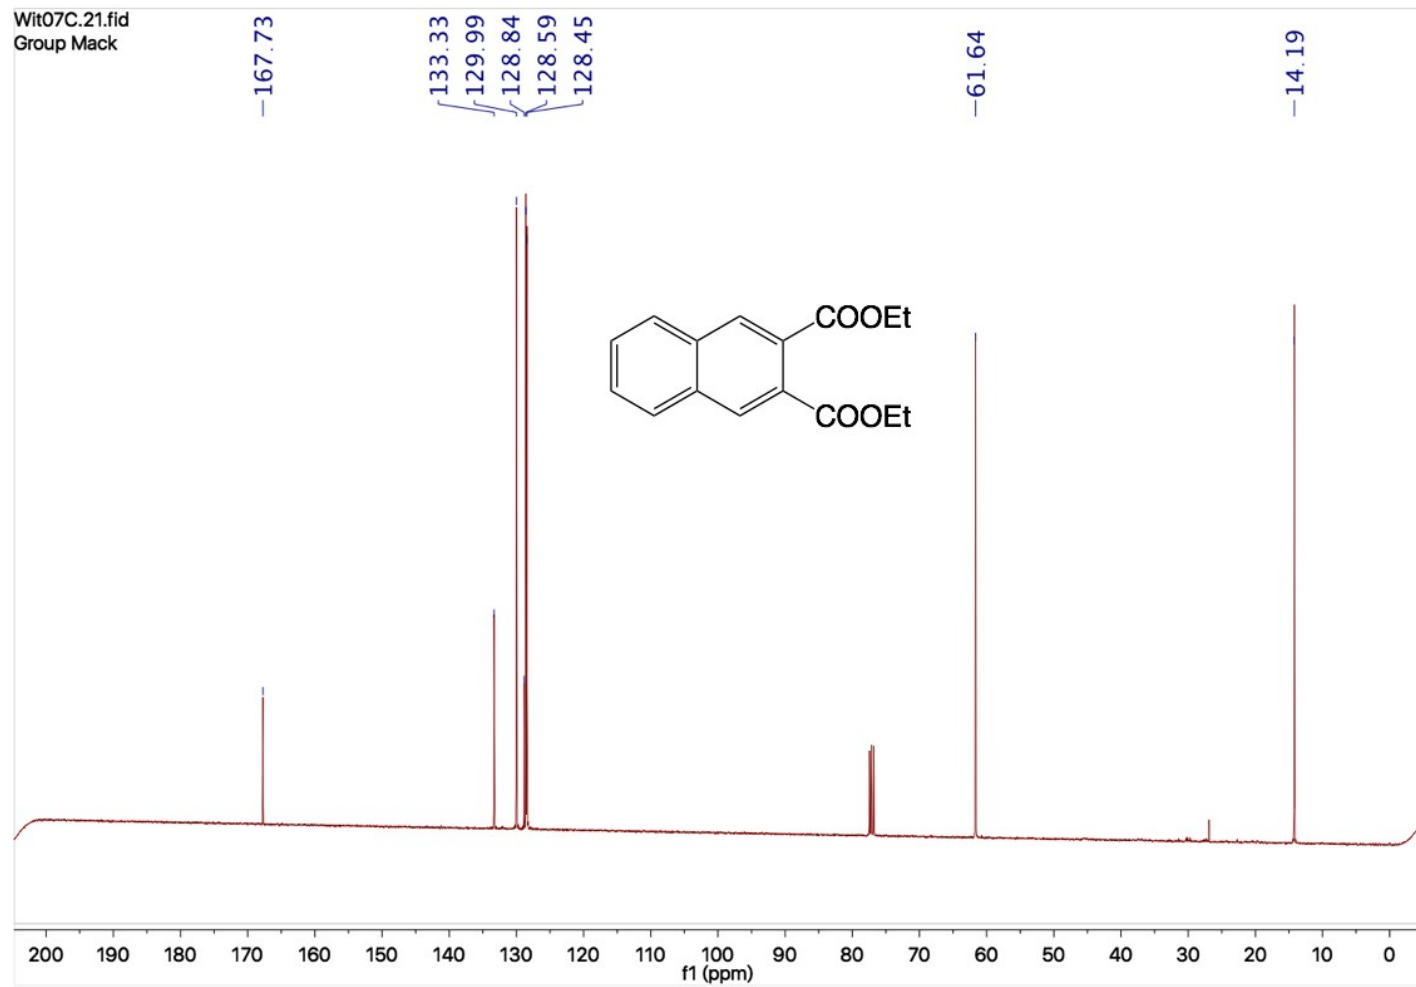

HRMS of Naphthalene-2,3-dicarboxylic acid diethyl ester, (M+H<sup>+</sup>), (C<sub>16</sub>H<sub>16</sub>O<sub>4</sub>)H<sup>+</sup>

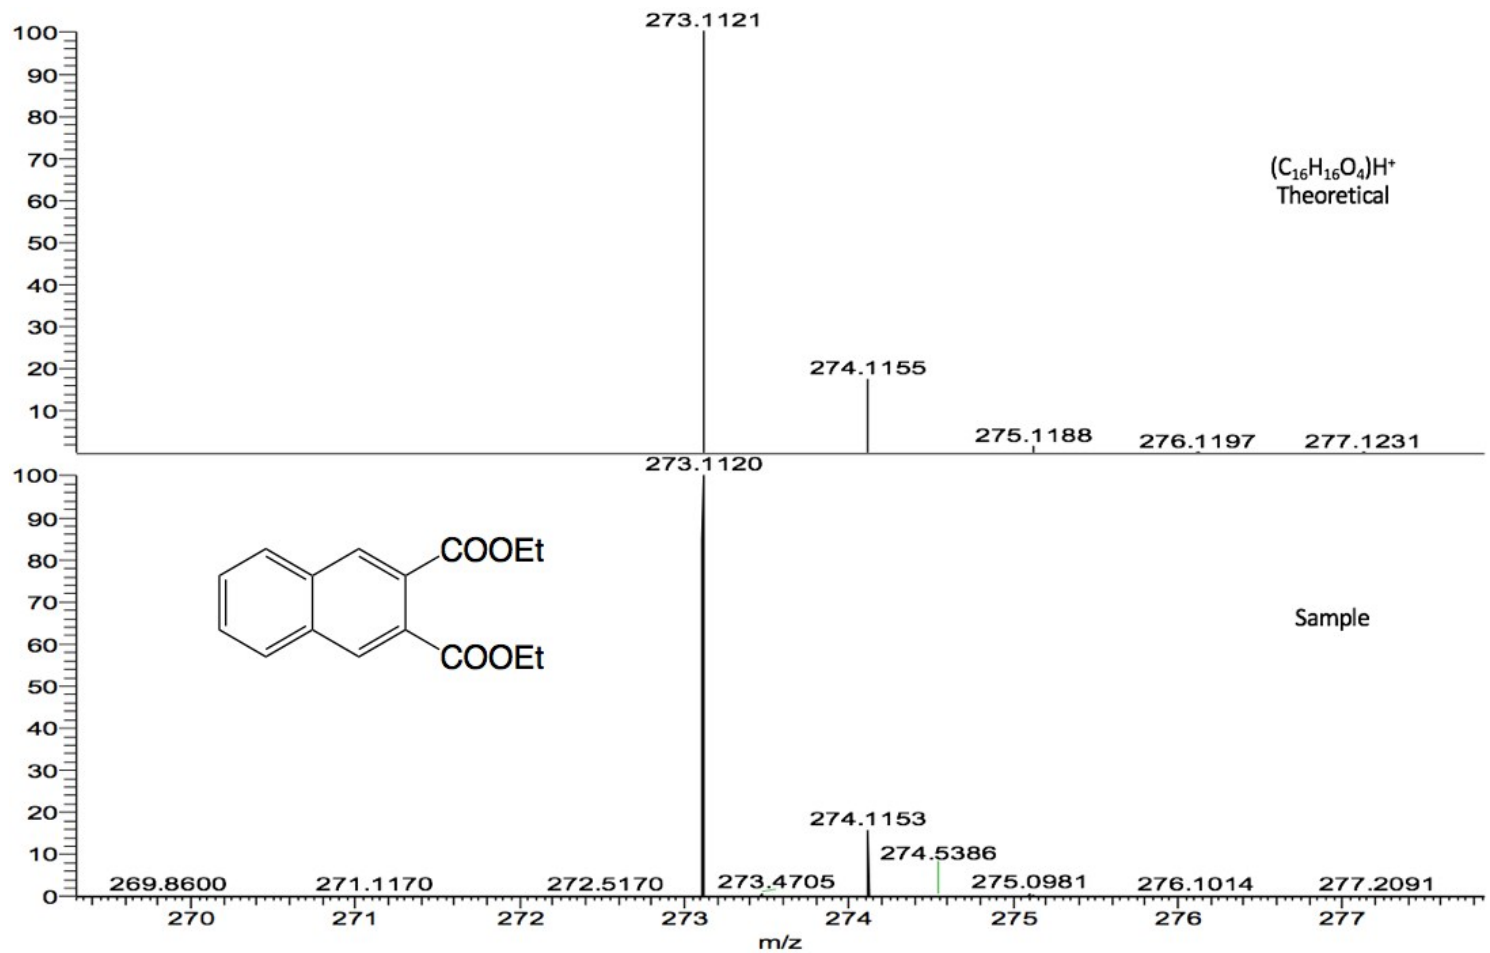

NL:  
8.32E5  
C<sub>16</sub>H<sub>16</sub>O<sub>4</sub>H:  
C<sub>16</sub>H<sub>17</sub>O<sub>4</sub>  
pa Chrg 1

NL:  
8.61E6

(C<sub>16</sub>H<sub>16</sub>O<sub>4</sub>)H<sup>+</sup>  
Theoretical

Sample

<sup>1</sup>H-NMR of (3-Hydroxymethyl-naphthalen-2-yl)-methanol

Wit08C.102.fid  
Group Mack

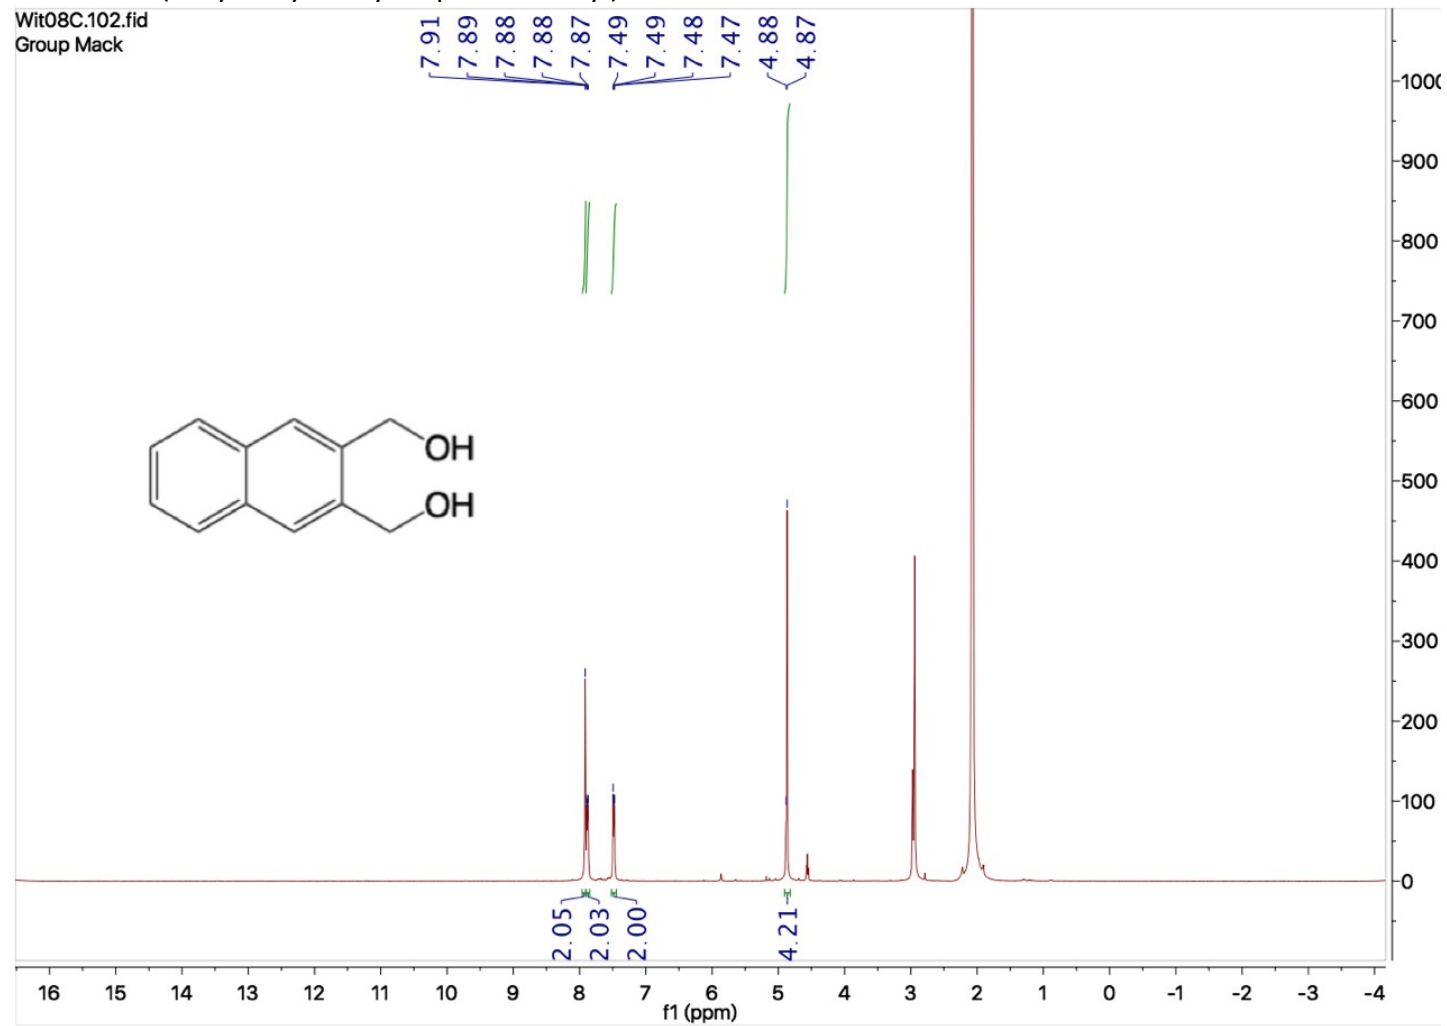

<sup>13</sup>C-NMR of (3-Hydroxymethyl-naphthalen-2-yl)-methanol

Wit08C.103.fid  
Group Mack

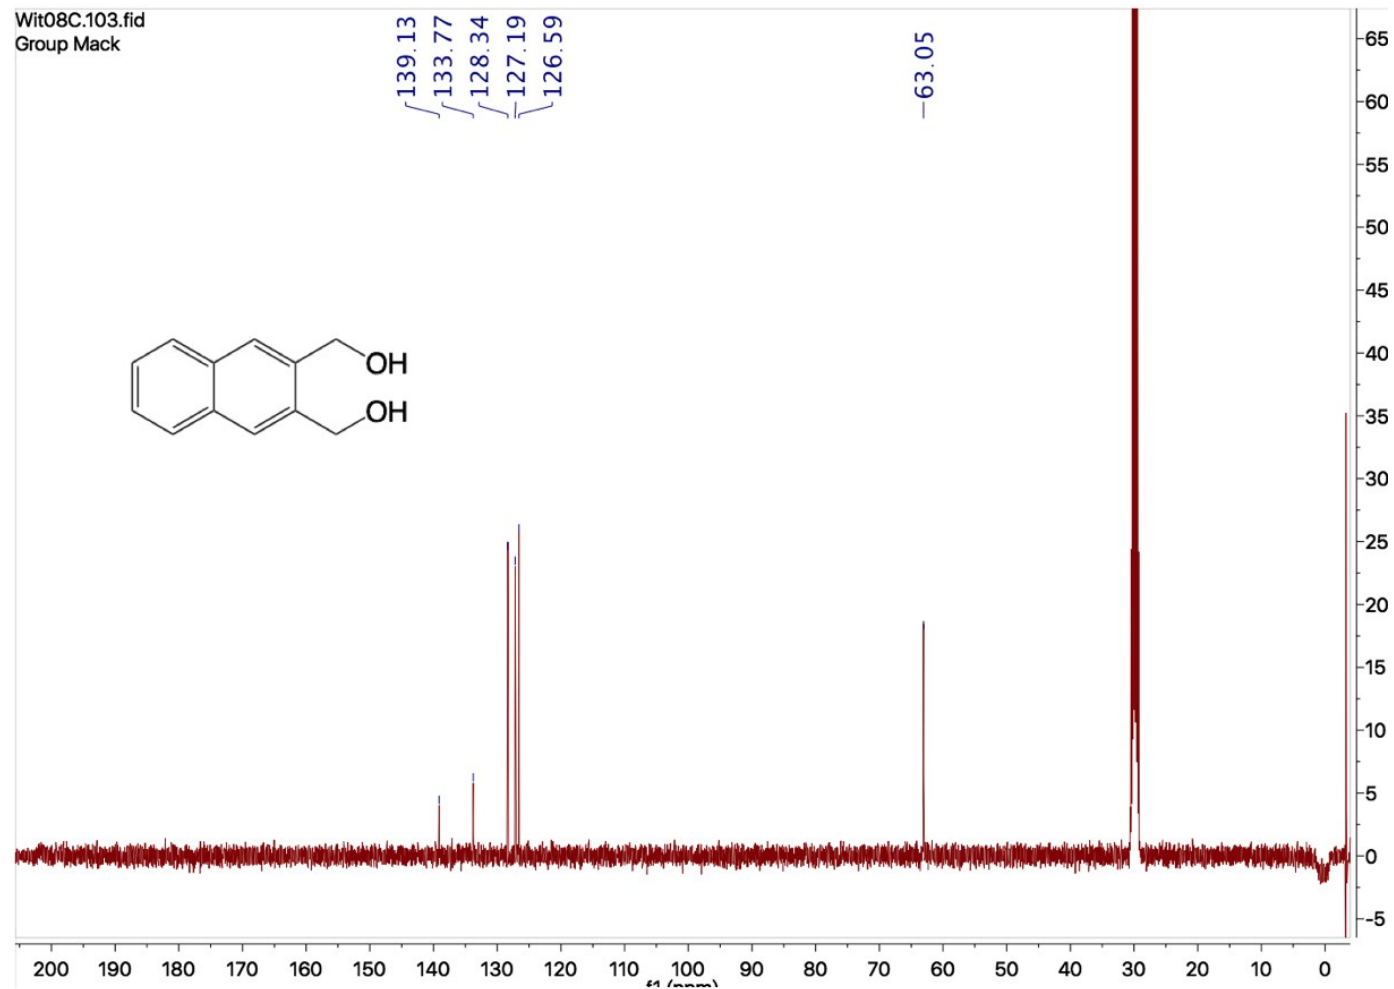

HRMS of (3-Hydroxymethyl-naphthalen-2-yl)-methanol, (M+Na<sup>+</sup>), (C<sub>12</sub>H<sub>12</sub>O<sub>2</sub>)Na<sup>+</sup>

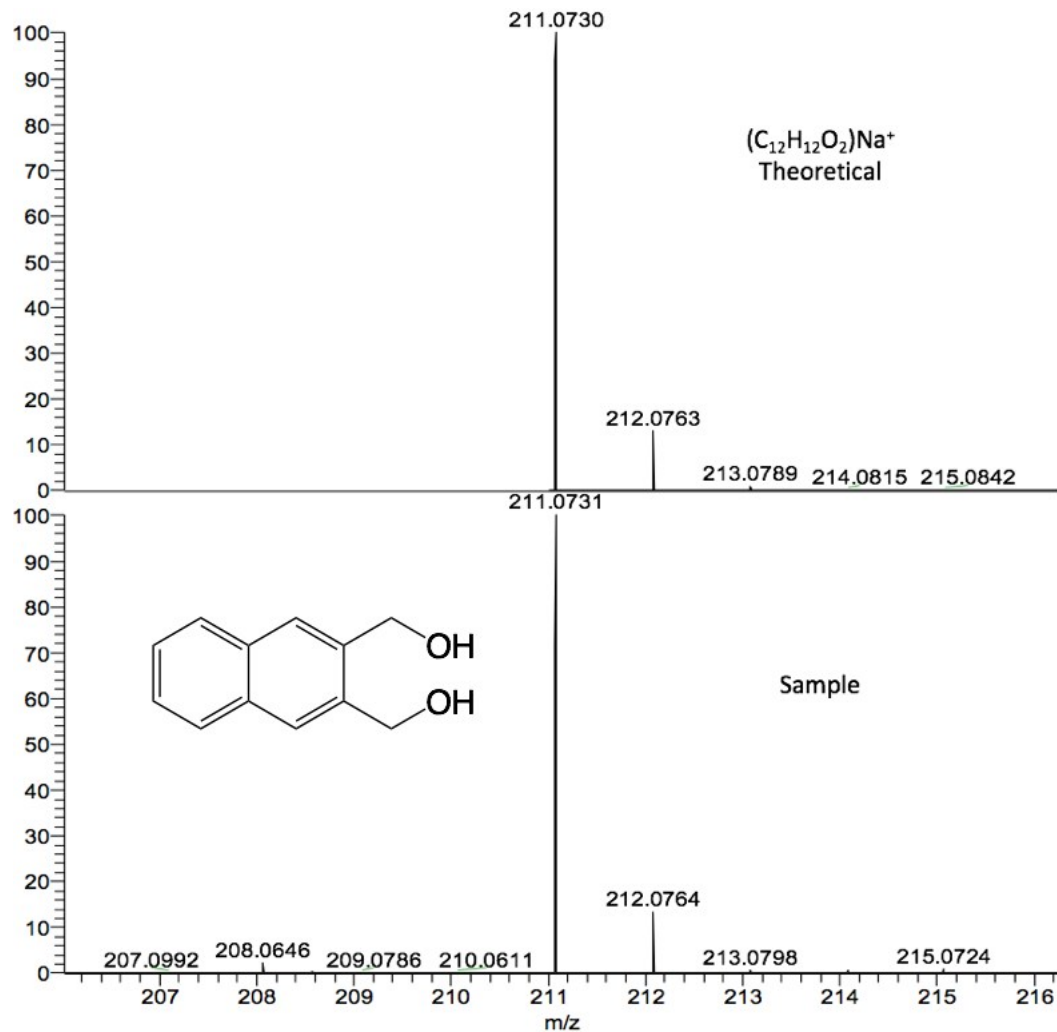

NL:  
2.05E4  
C<sub>12</sub>H<sub>12</sub>O<sub>2</sub>Na:  
C<sub>12</sub>H<sub>12</sub>O<sub>2</sub>Na<sub>1</sub>  
p (gss, s /p:40) Chrg 1  
R: 80000 Res .Pwr . @FWHM

NL:  
1.29E8  
Rawdata#28-291 RT:  
0.33-0.58 AV: 49 F: FTMS +  
p ESI Full ms  
[100.0000-1000.0000]

# <sup>1</sup>H-NMR of Naphthalene-2,3-dicarbaldehyde

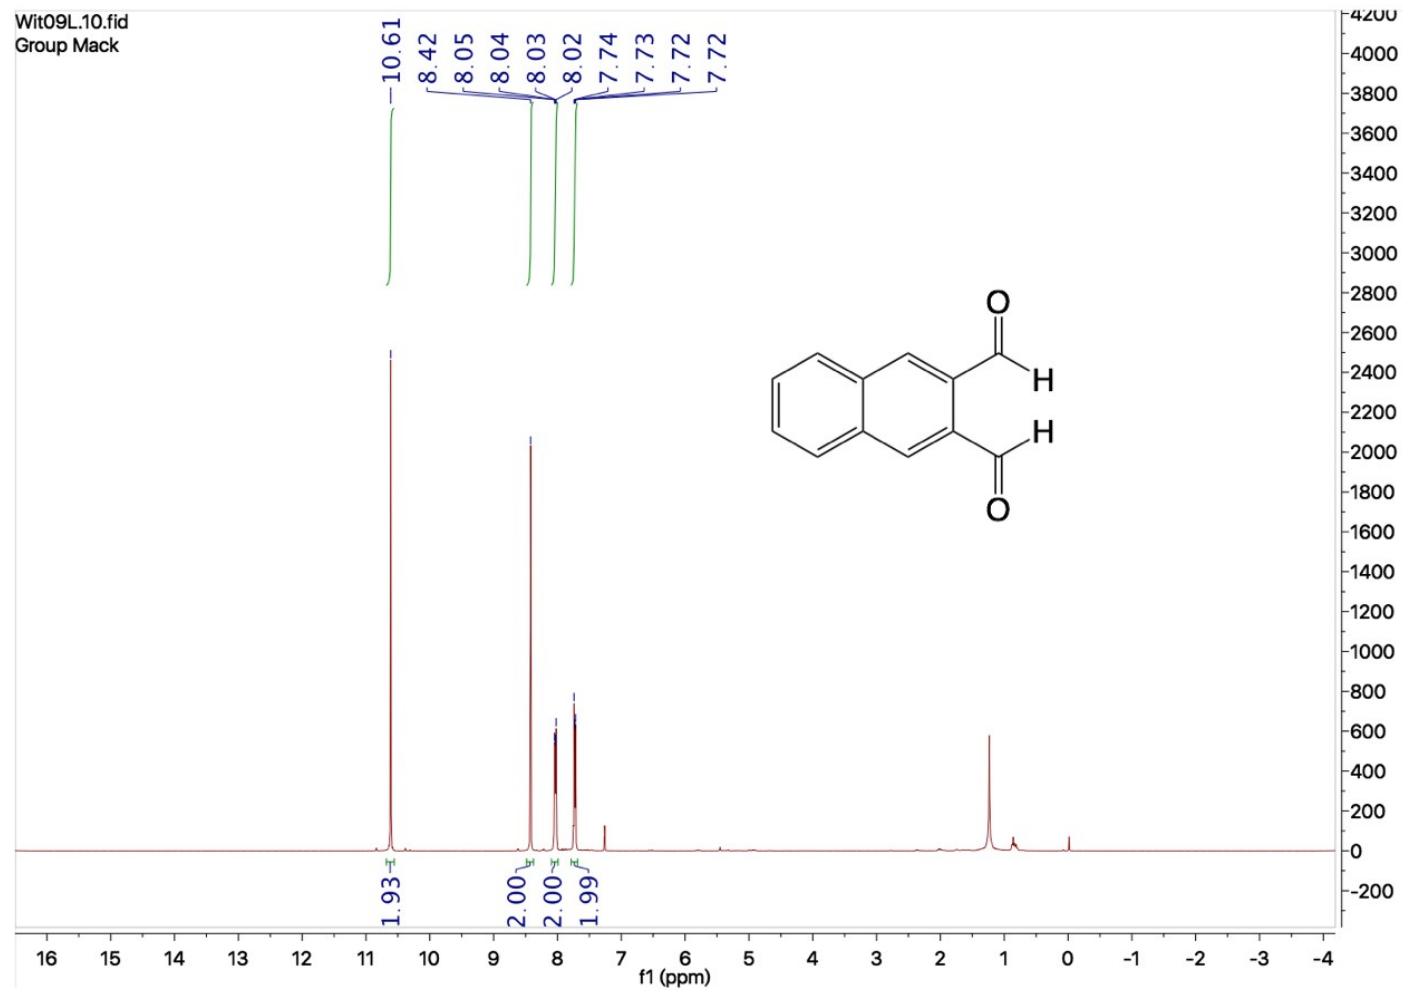

<sup>13</sup>C-NMR Naphthalene-2,3-dicarbaldehyde

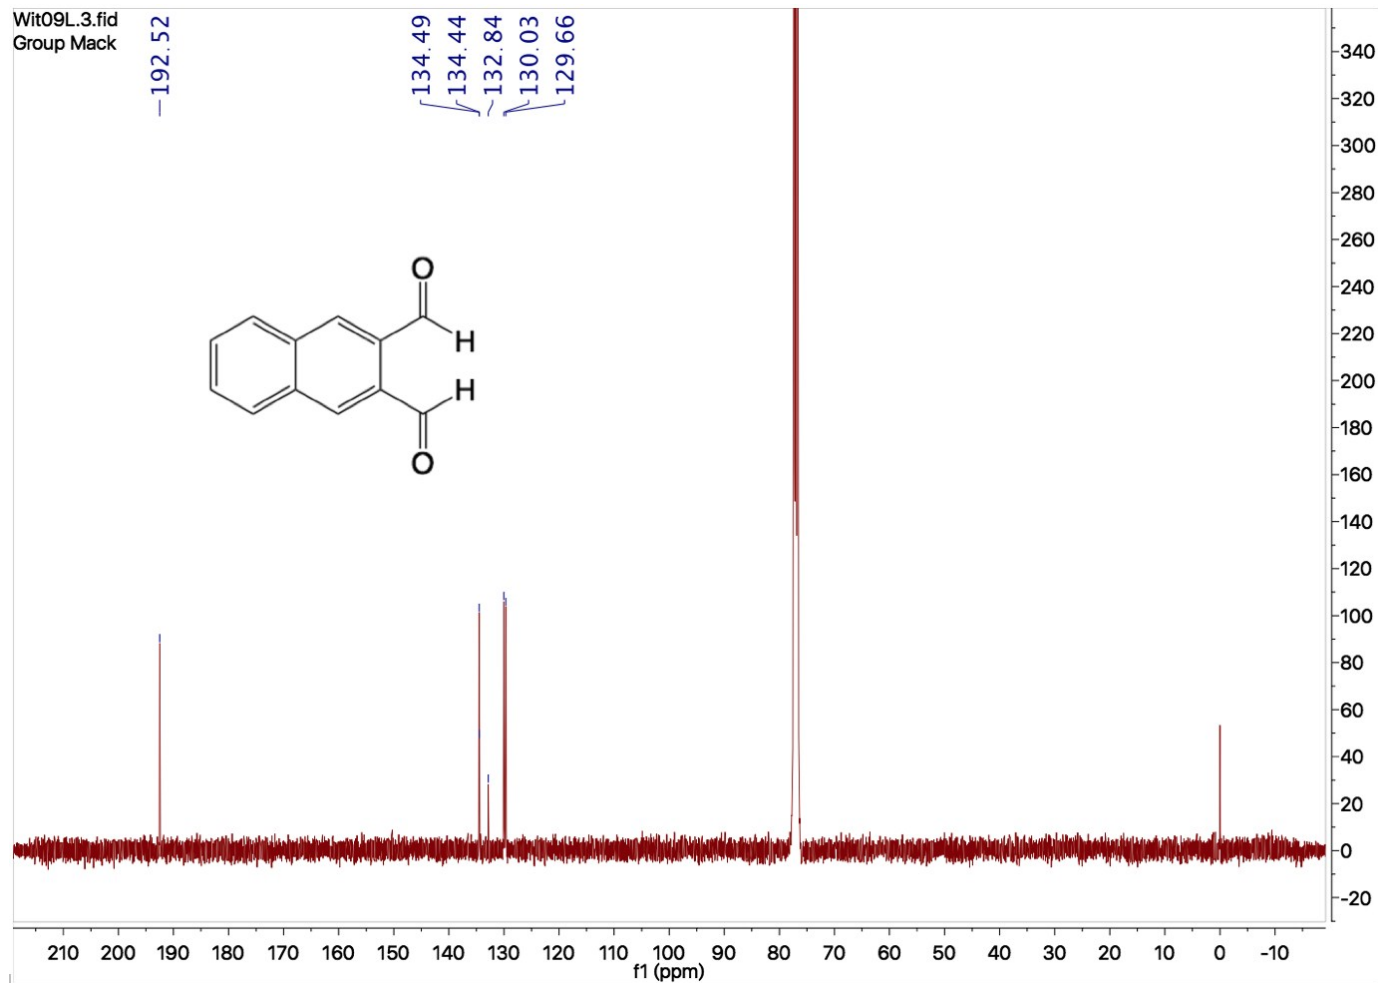

# GCMS of Naphthalene-2,3-dicarbaldehyde

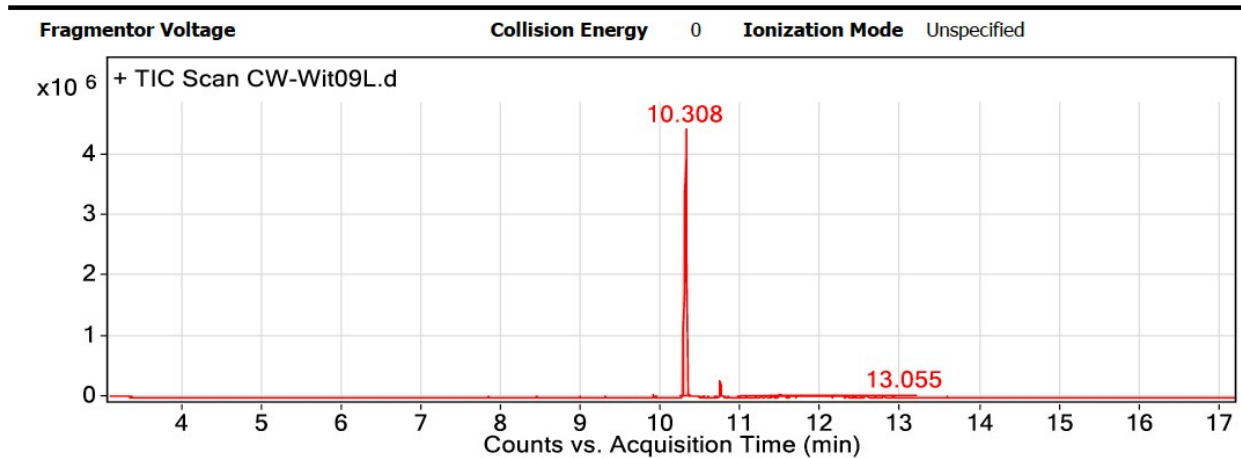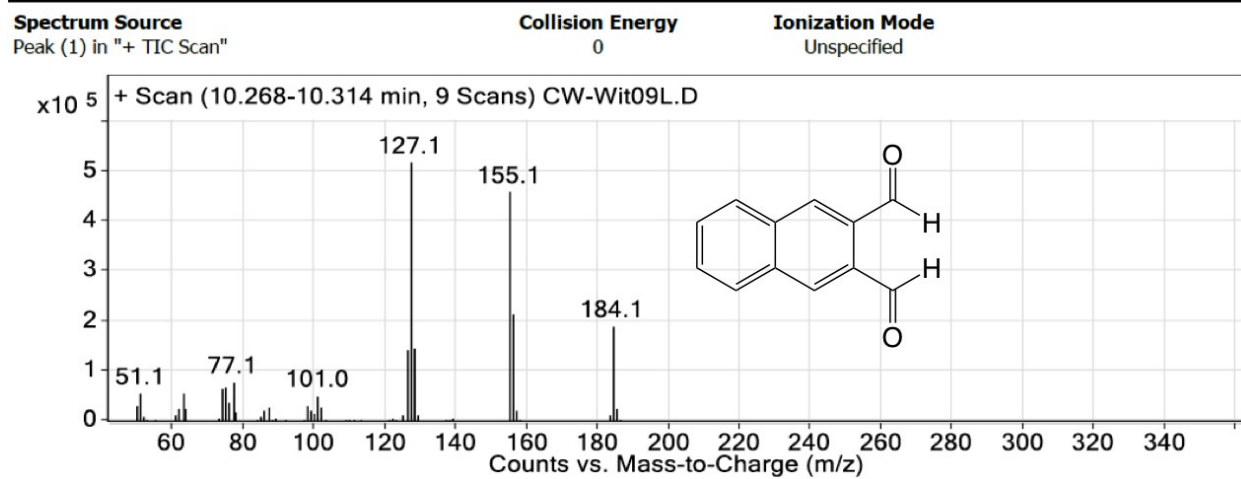



<sup>1</sup>H-NMR of Anthracene-2,3-dicarboxylic acid diethyl ester

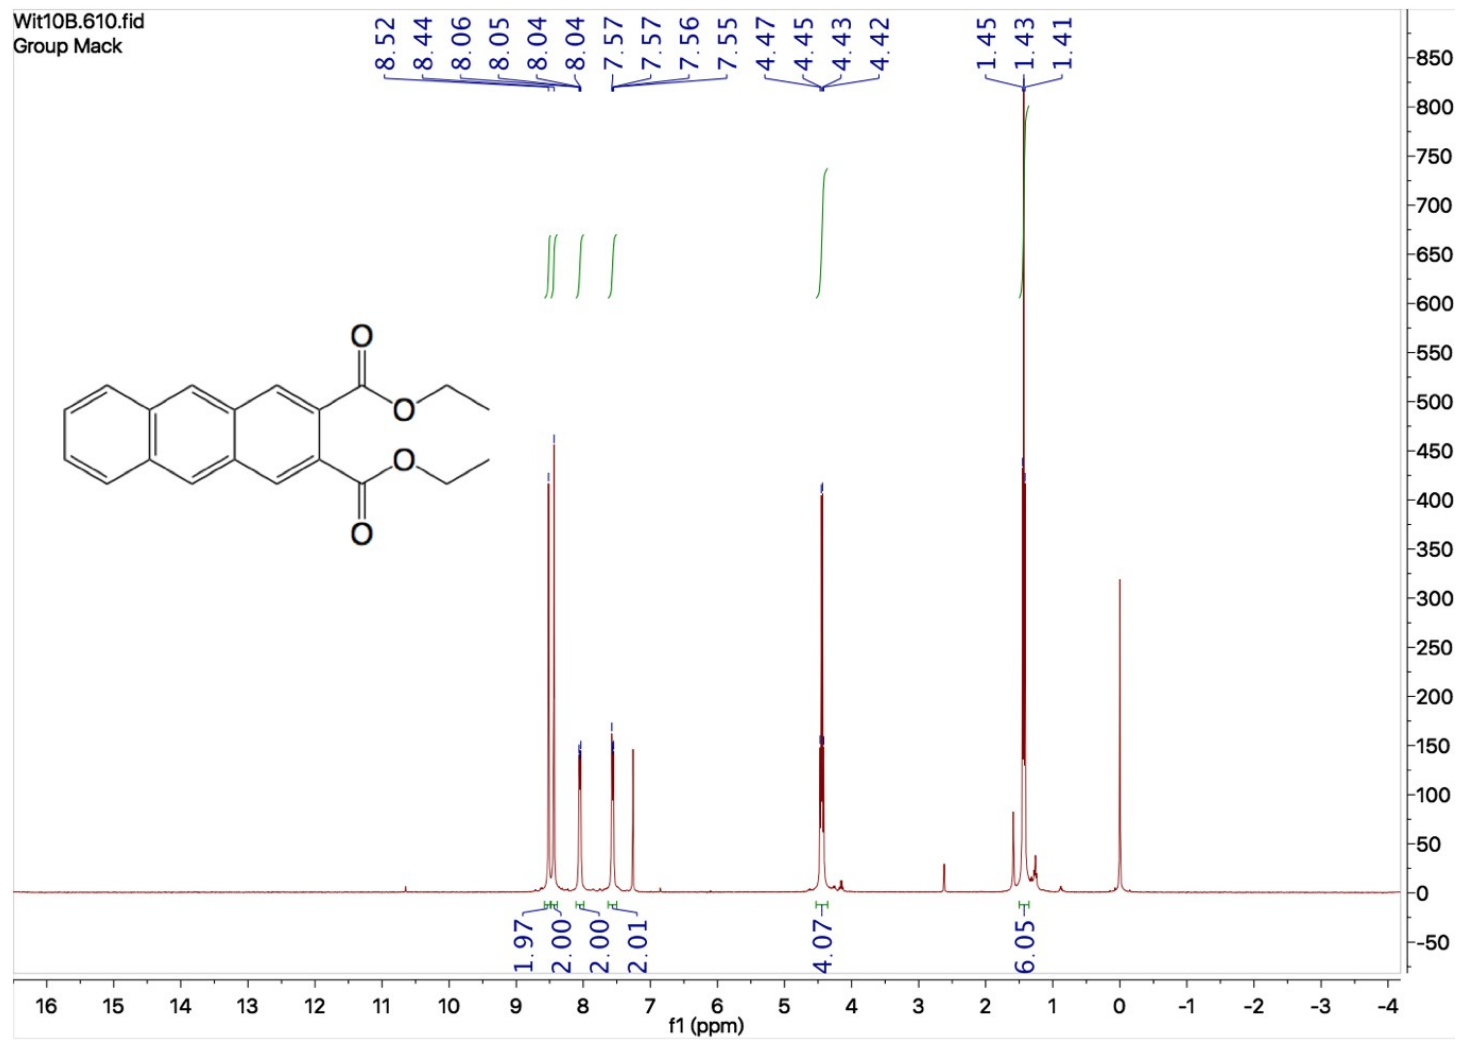

<sup>13</sup>C-NMR of Anthracene-2,3-dicarboxylic acid diethyl ester

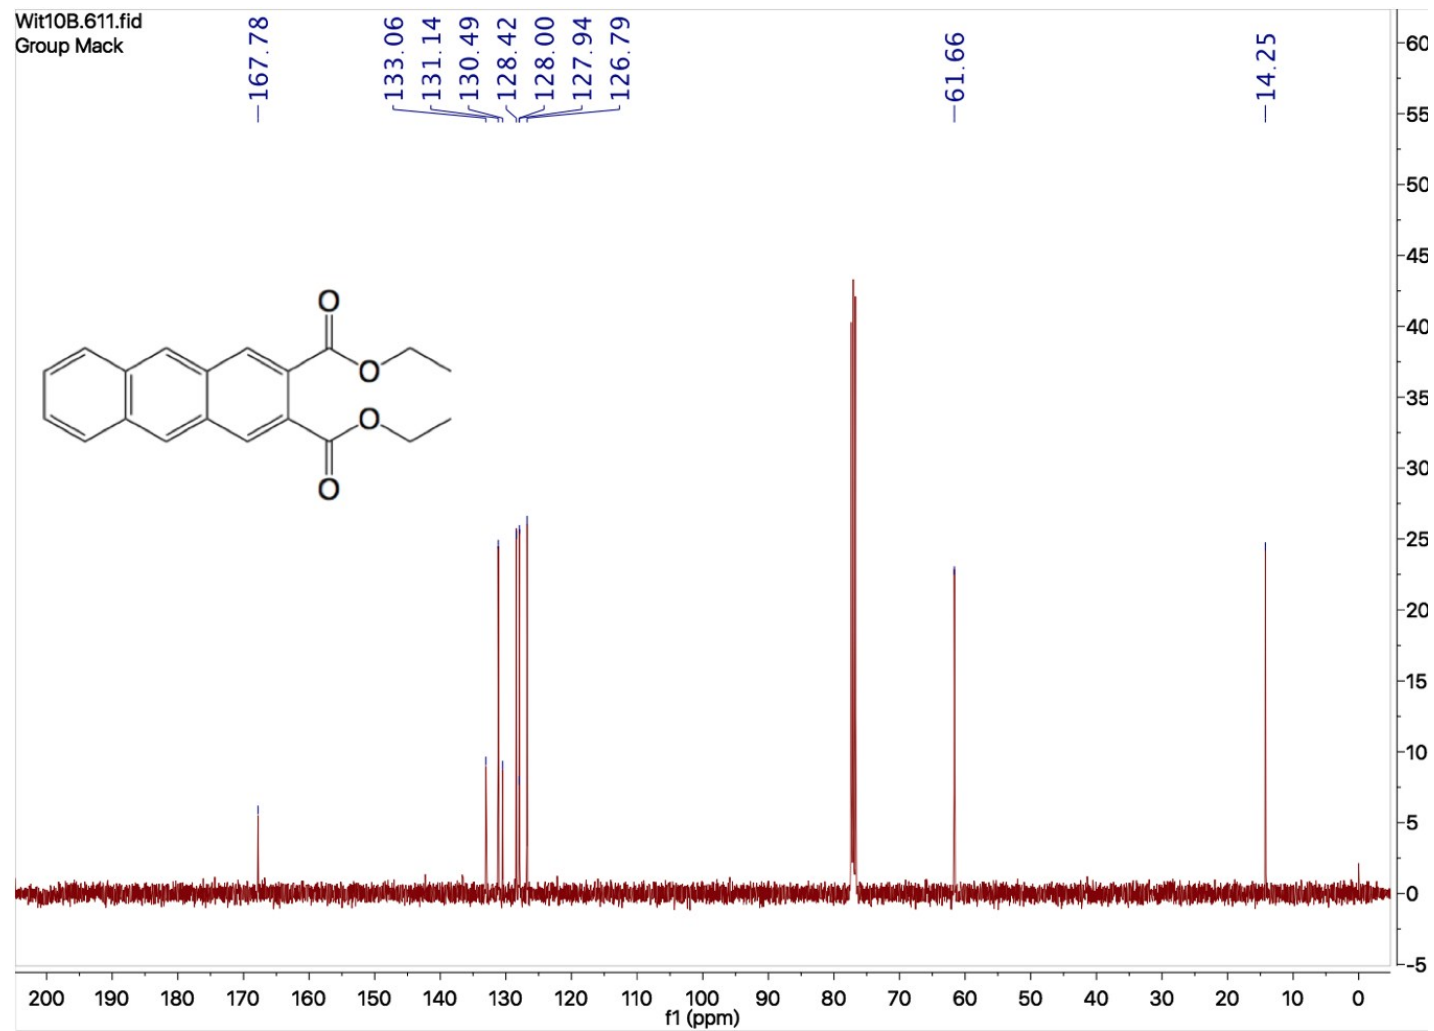

GCMS of Anthracene-2,3-dicarboxylic acid diethyl ester

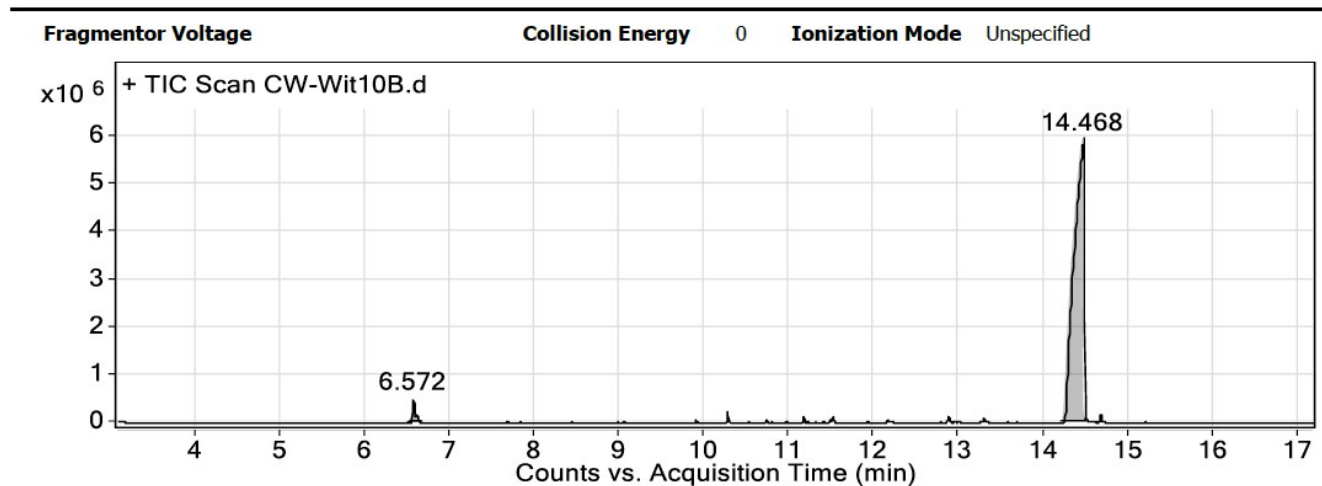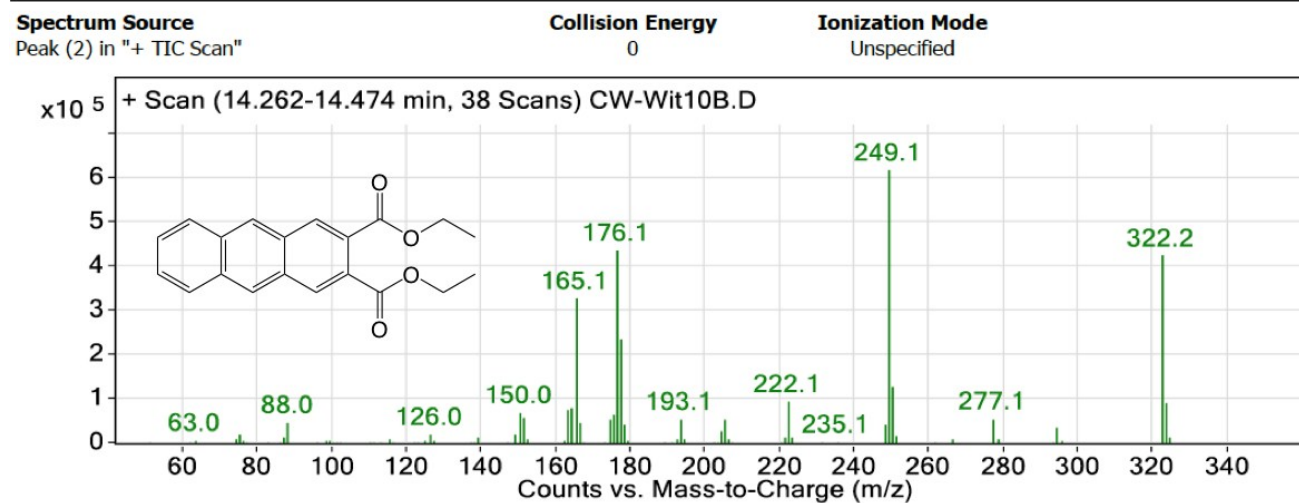

<sup>1</sup>H-NMR of (3-Hydroxymethyl-anthracen-2-yl)-methanol

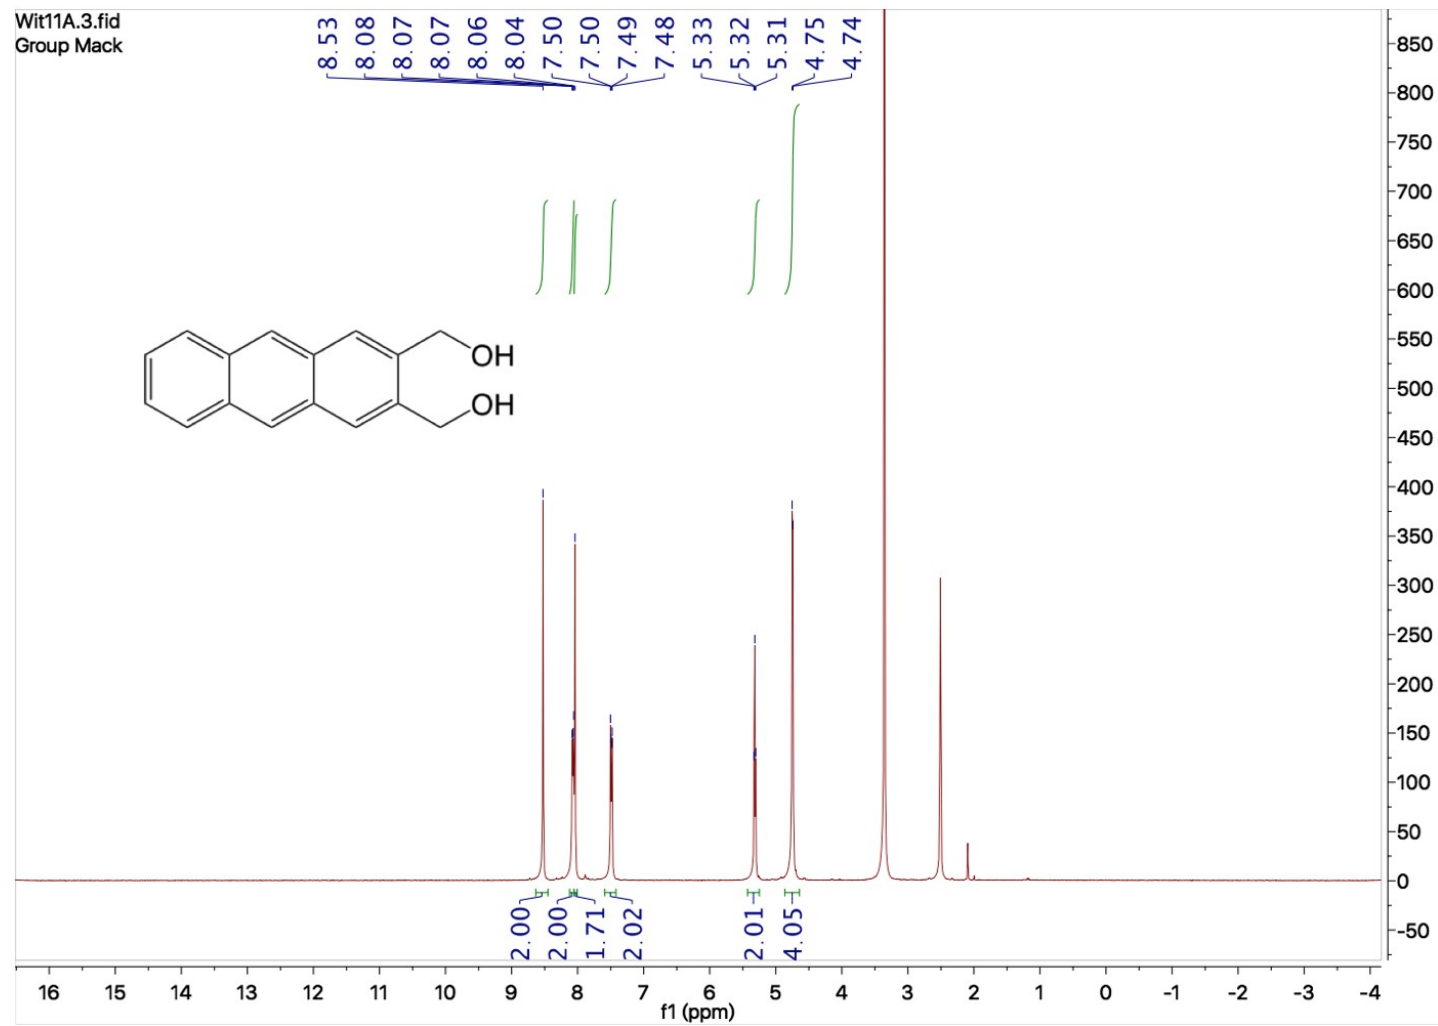

<sup>13</sup>C-NMR of (3-Hydroxymethyl-anthracen-2-yl)-methanol

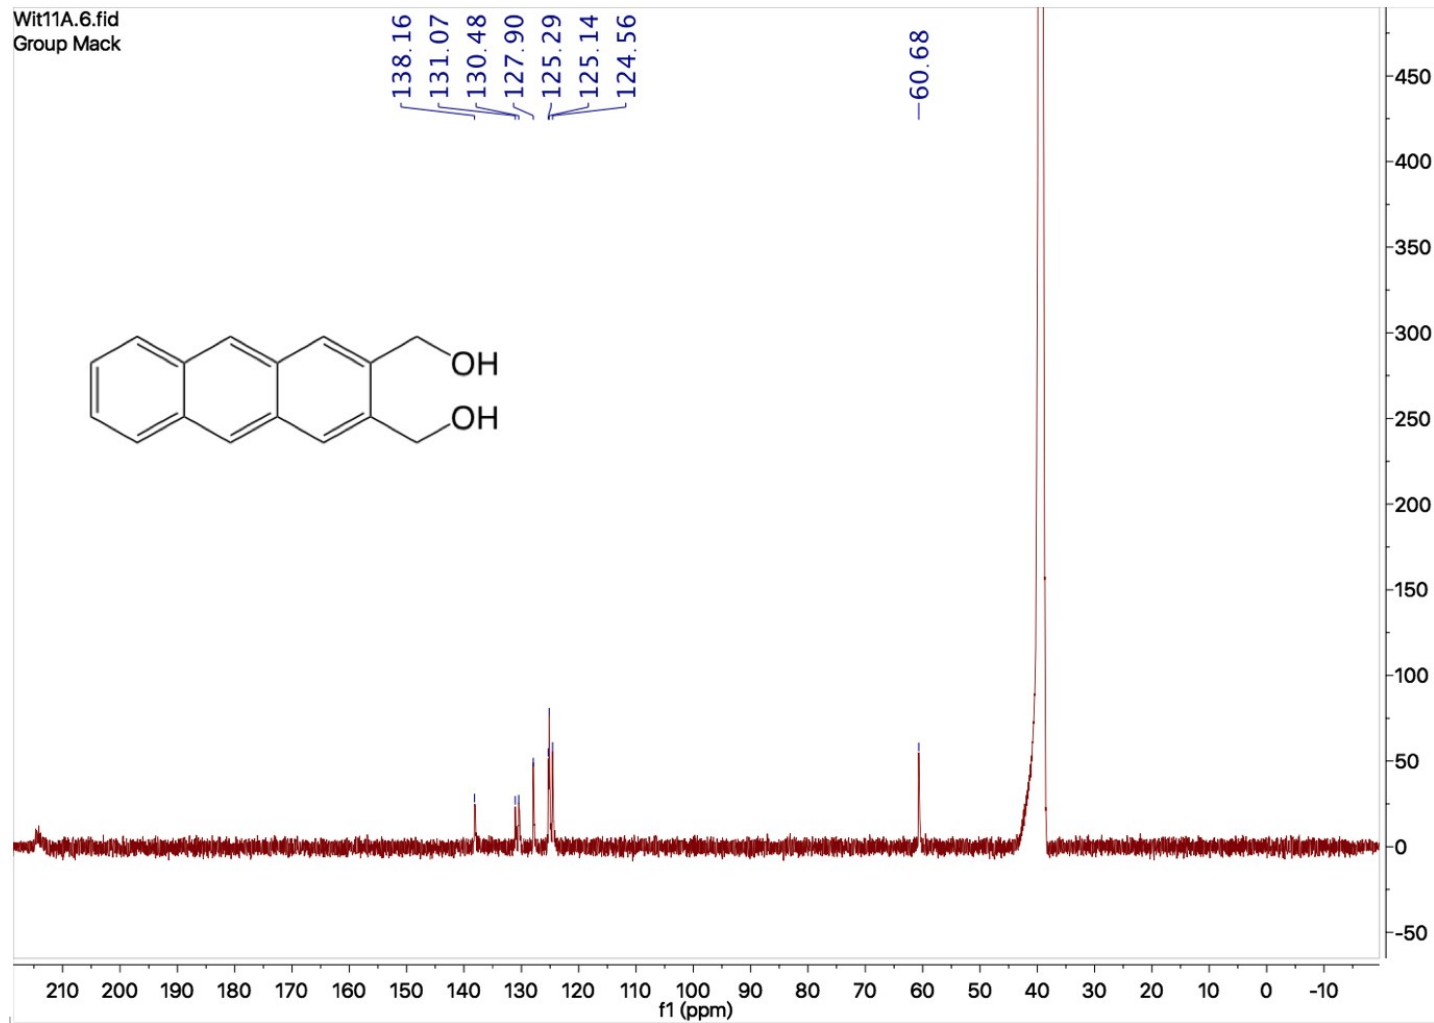

HRMS of (3-Hydroxymethyl-anthracen-2-yl)-methanol, (M+Na<sup>+</sup>), (C<sub>16</sub>H<sub>14</sub>O<sub>2</sub>)Na<sup>+</sup>

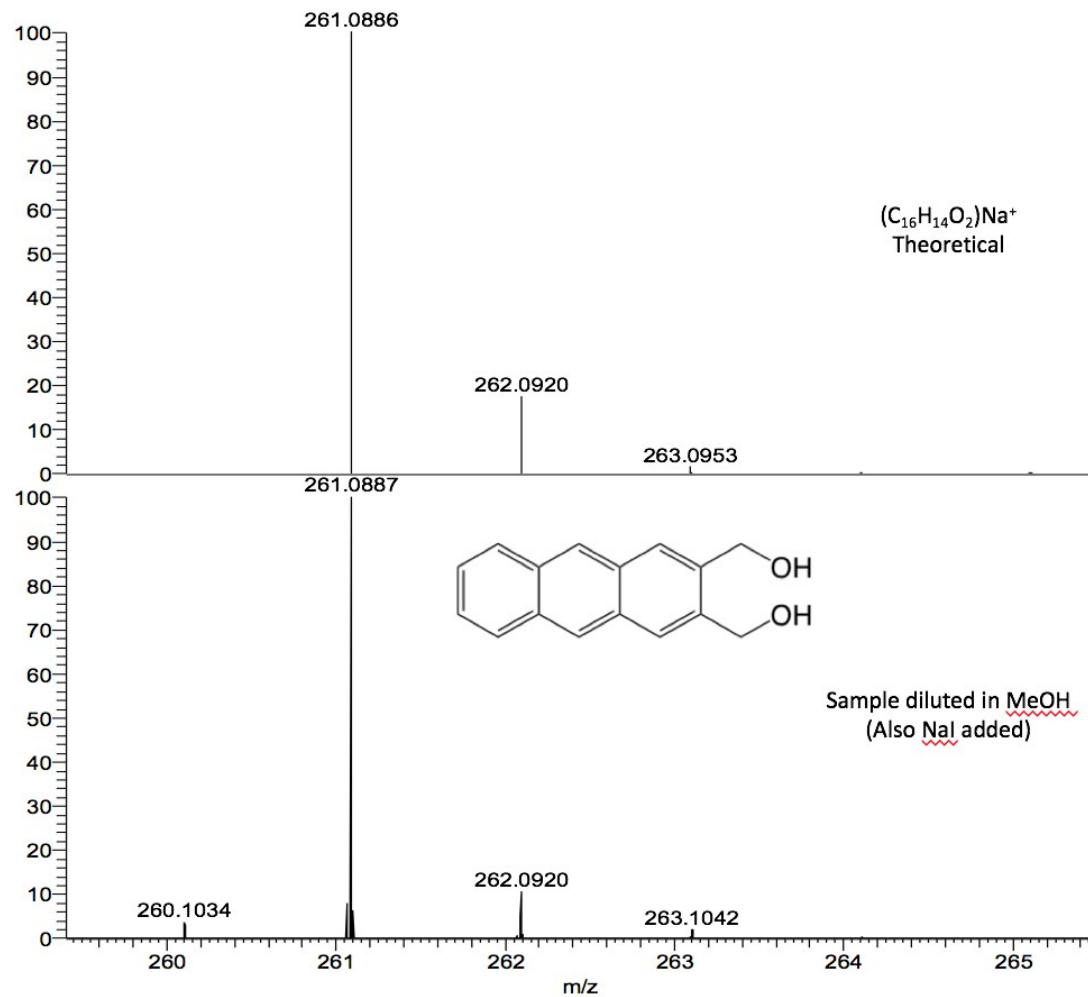

NL:  
8.36E5  
C<sub>16</sub> H<sub>14</sub> O<sub>2</sub> Na:  
C<sub>16</sub> H<sub>14</sub> O<sub>2</sub> Na<sub>1</sub>  
pa Chrg 1

NL:  
1.21E7  
[CW-Wit II A]#194-284  
RT: 0.36-0.84 AV: 91 T:  
FTMS + p ESI cv=0.00  
Full ms  
[50.0000-1000.0000]

Sample diluted in MeOH  
(Also NaI added)

# <sup>1</sup>H-NMR of Anhracene-2,3-dicarbaldehyde

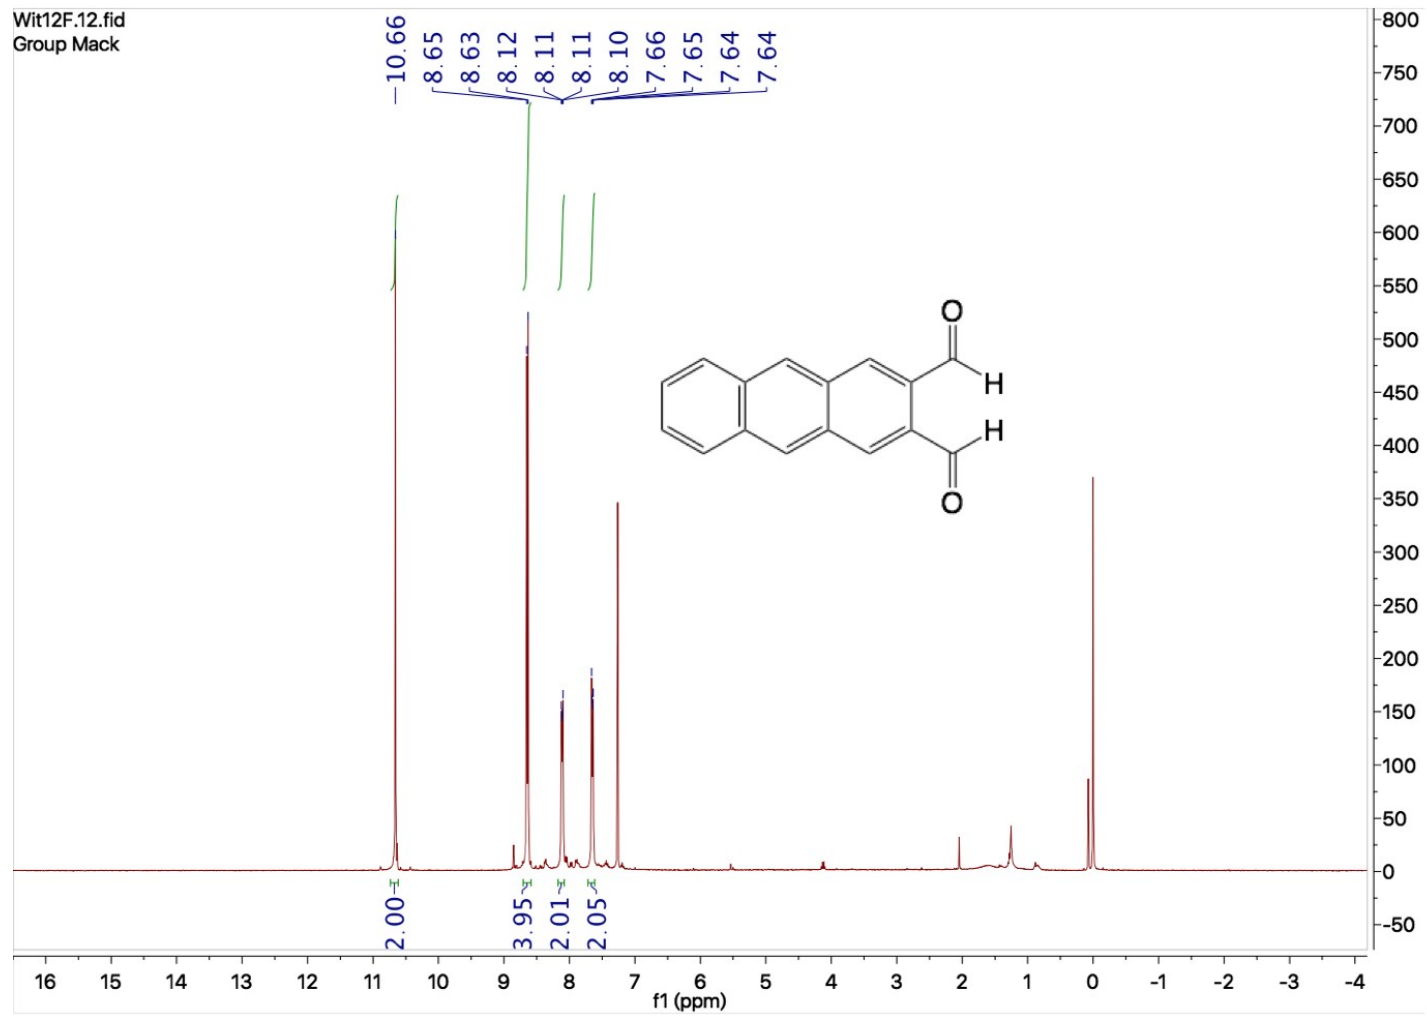

<sup>13</sup>C-NMR of Anhracene-2,3-dicarbaldehyde

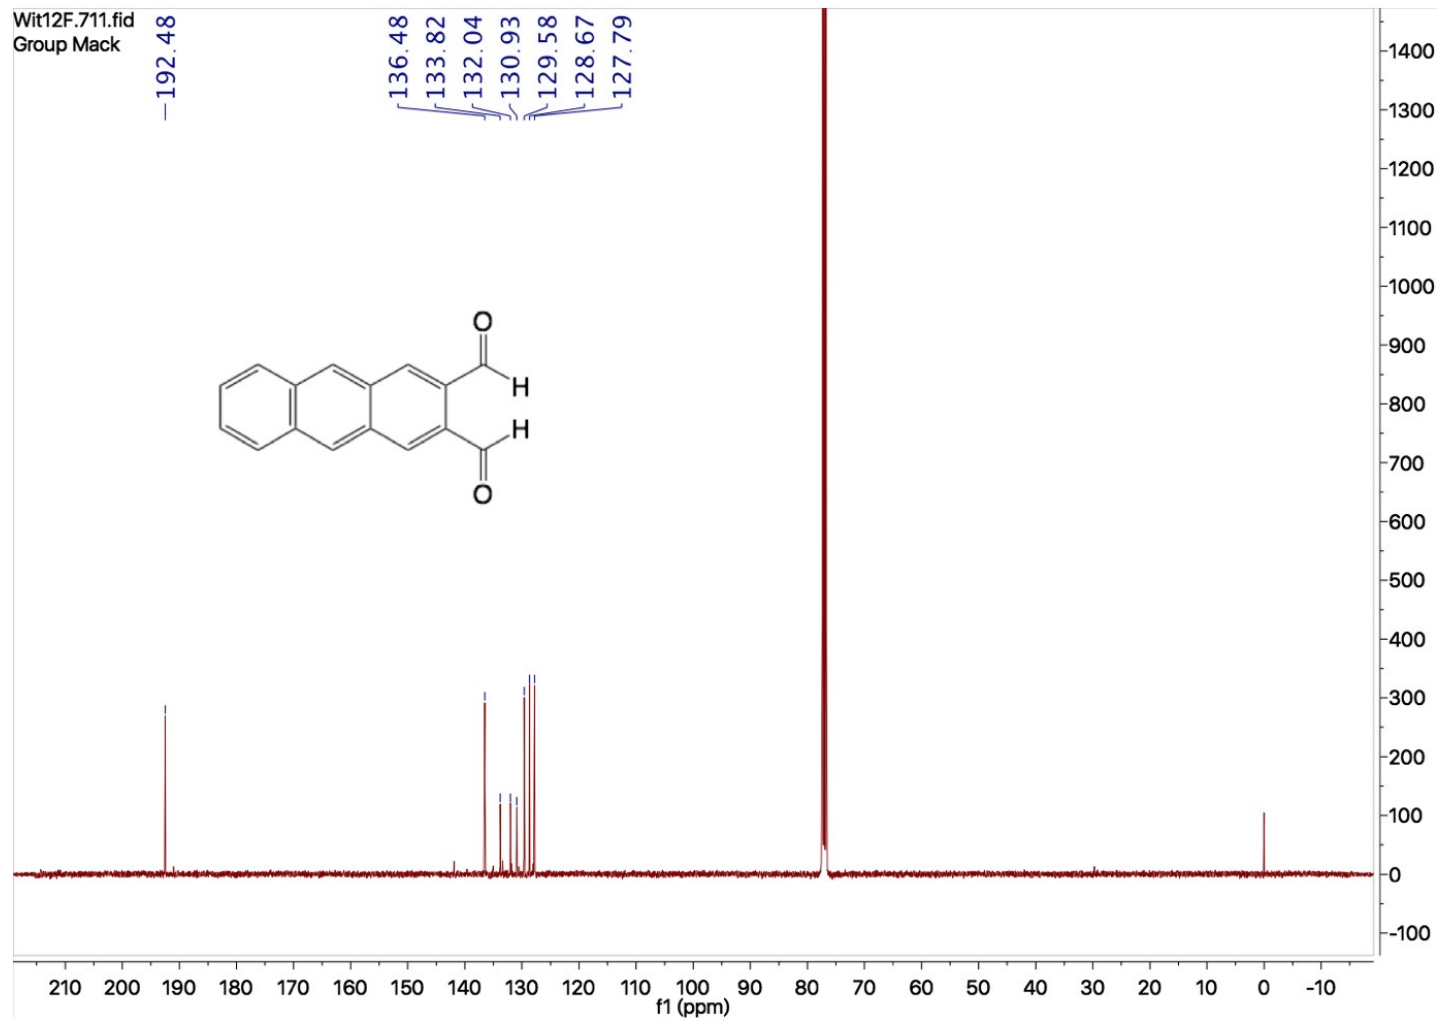



# GCMS of Anhracene-2,3-dicarbaldehyde

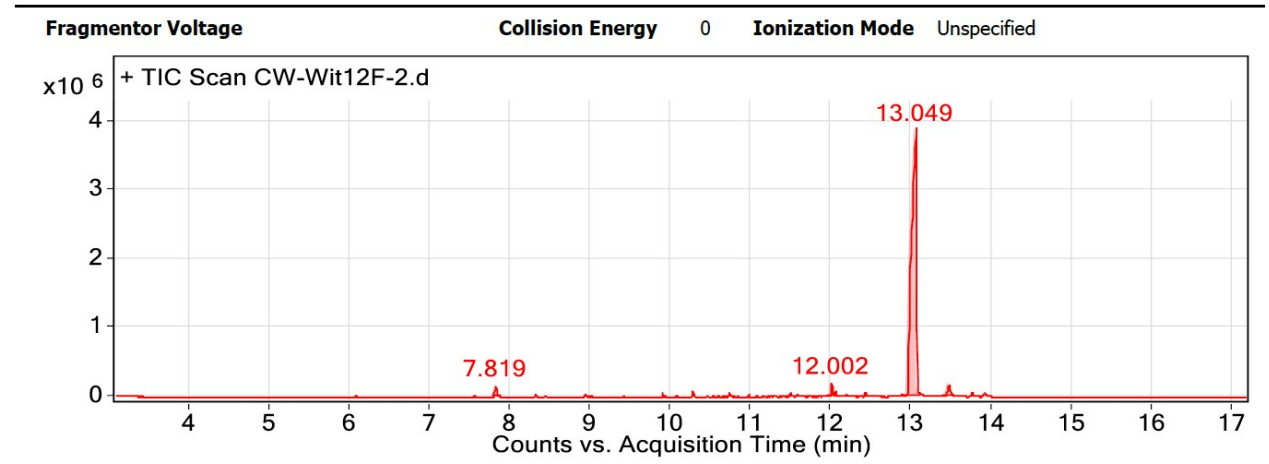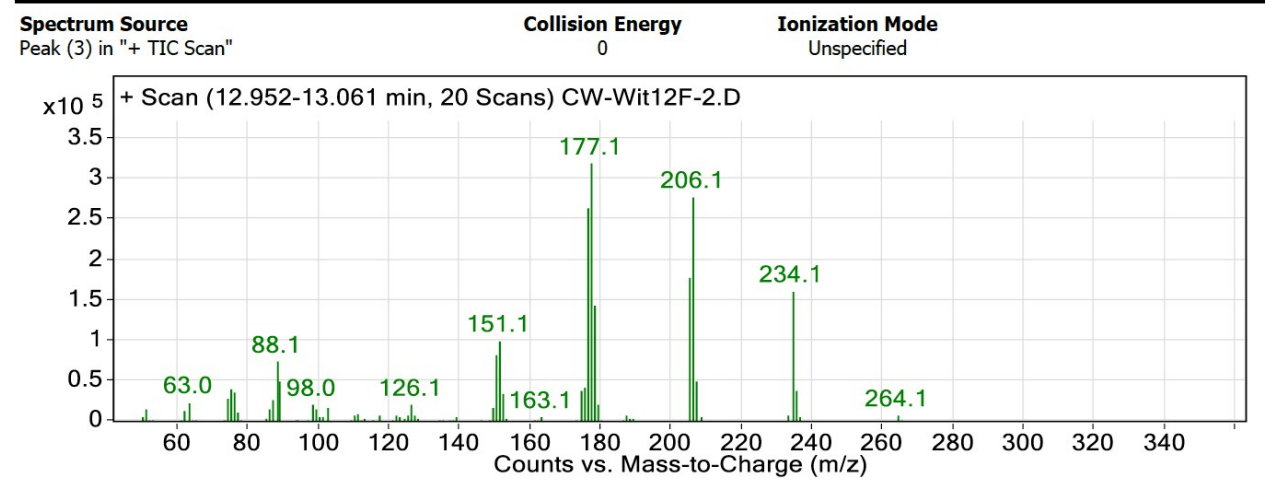

<sup>1</sup>H-NMR of Naphthacene-2,3-dicarboxylic acid diethyl ester

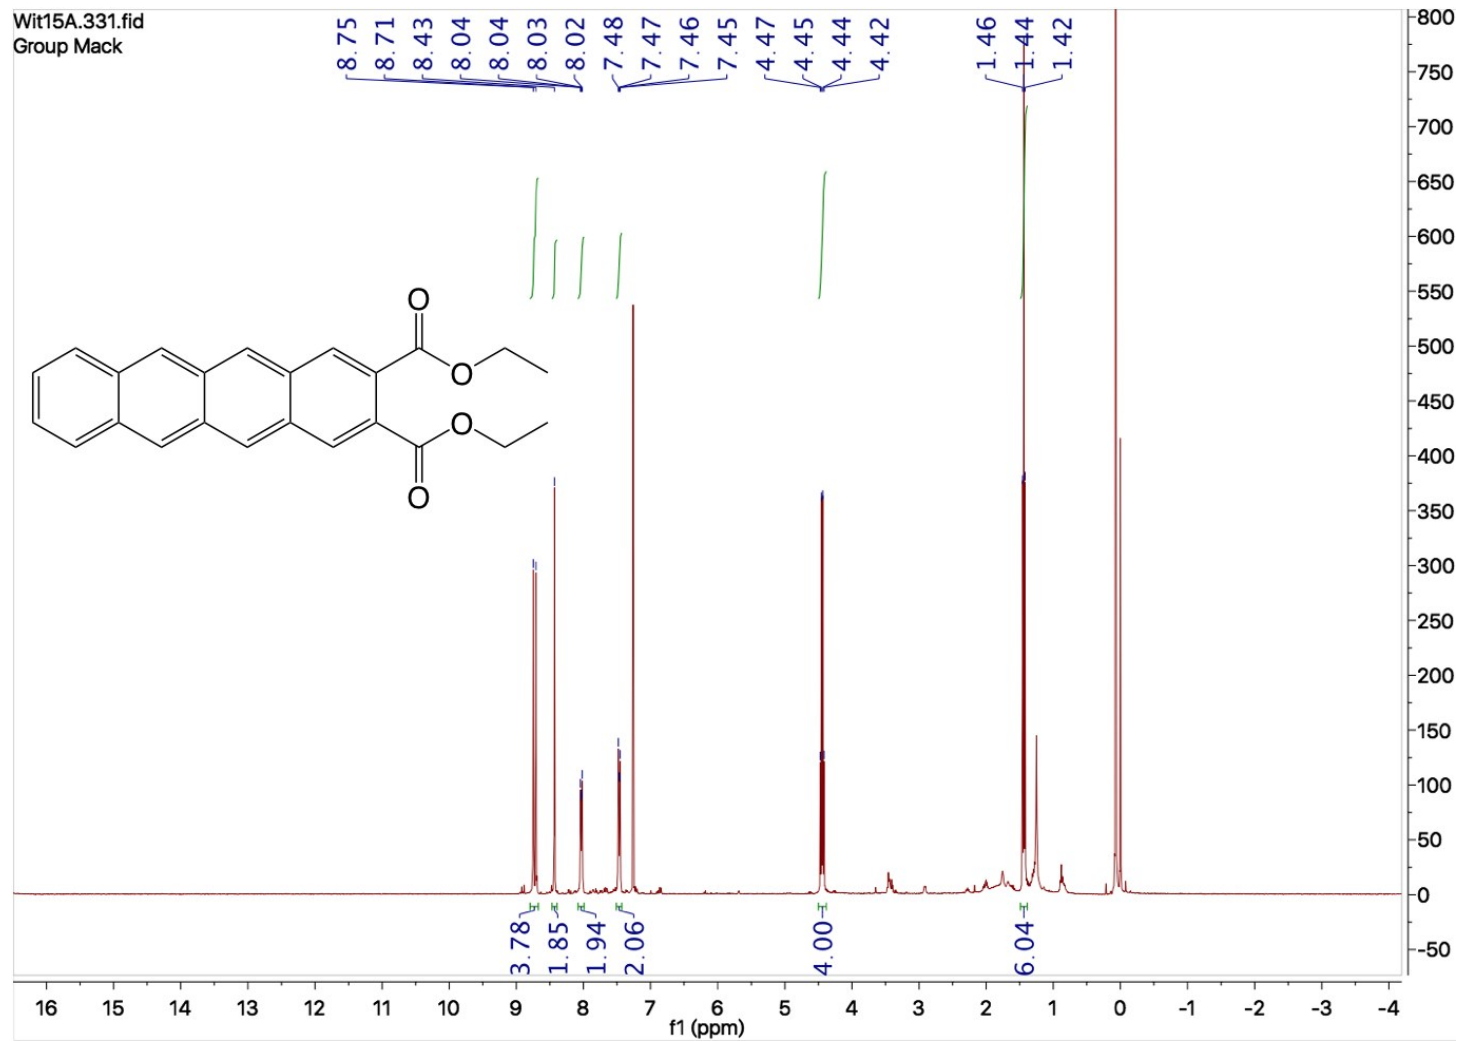

<sup>13</sup>C-NMR of Naphthalene-2,3-dicarboxylic acid diethyl ester

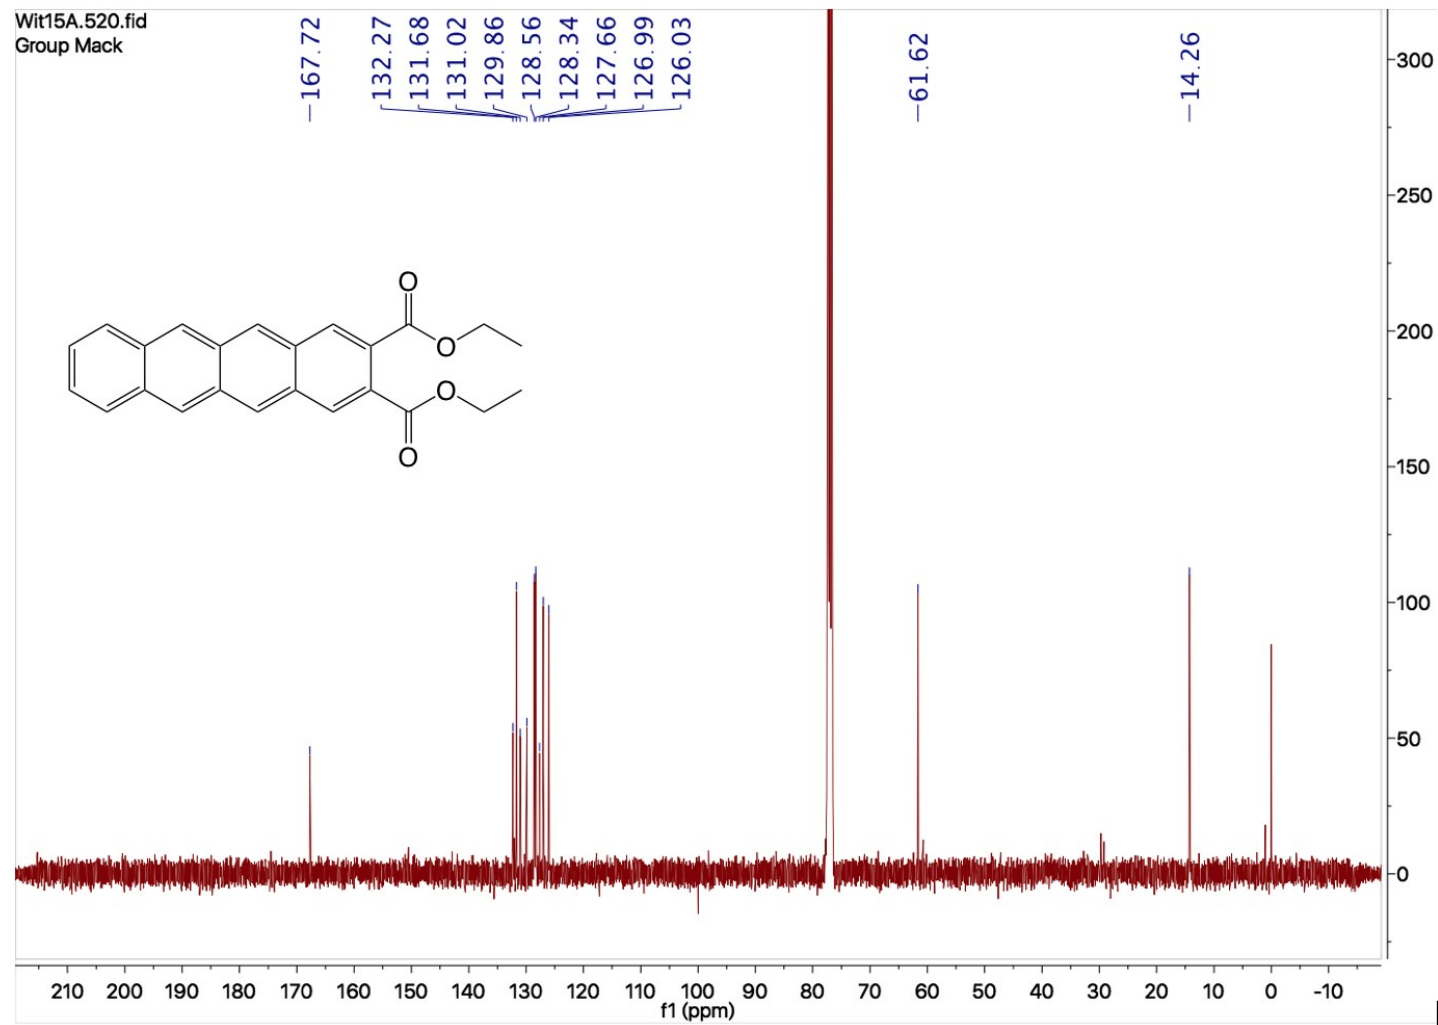

HRMS of Naphthacene-2,3-dicarboxylic acid diethyl ester, (M+Na<sup>+</sup>), (C<sub>24</sub>H<sub>20</sub>O<sub>4</sub>)Na<sup>+</sup>

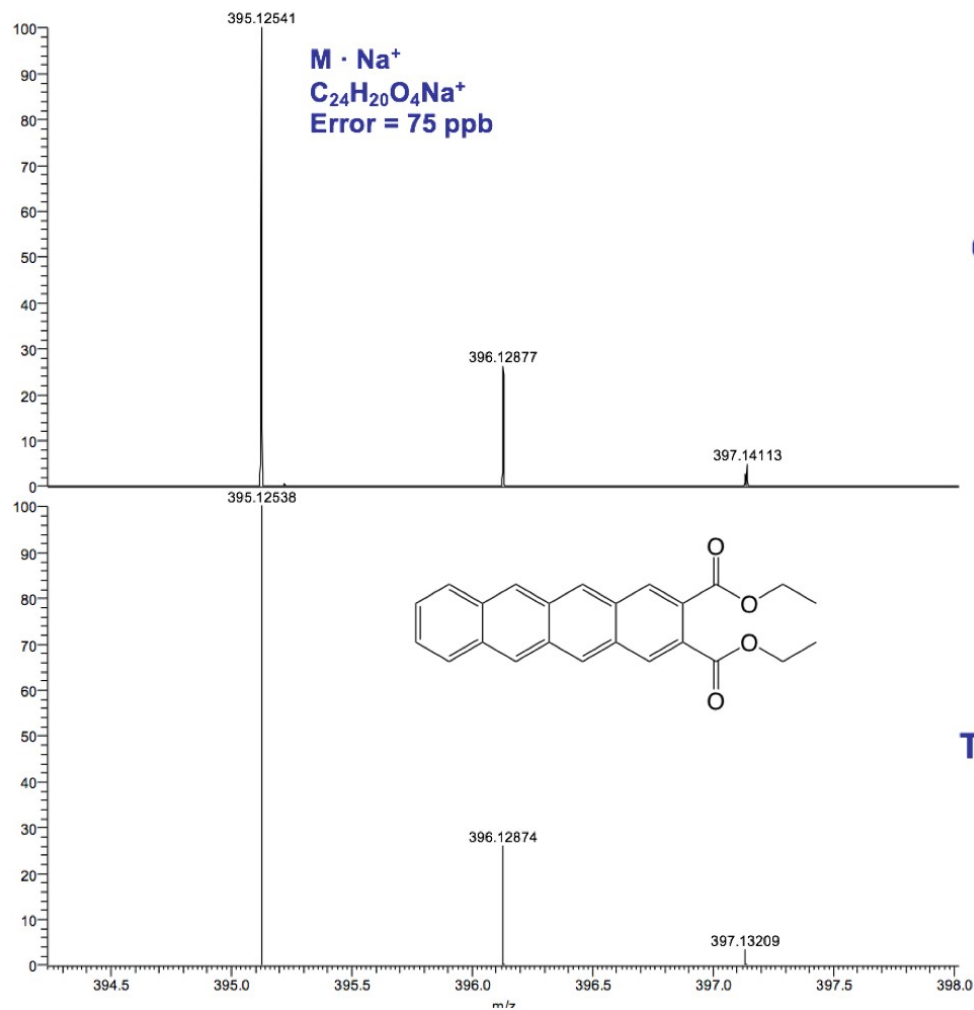

NL:  
3.33E4  
Wang\_CW-Wit-15-  
A\_20190610-R02#269-  
422 RT: 2.94-3.45 AV:  
20 F: FTMS + p ESI Full  
ms [190.00-1000.00]

NL:  
7.63E5  
C<sub>24</sub>H<sub>20</sub>O<sub>4</sub>Na:  
C<sub>24</sub>H<sub>20</sub>O<sub>4</sub>Na1  
pa Chrg 1

### Eco-Scale Calculation

Eco-Scale is a standard to evaluate the safety and environmental impact.<sup>8</sup> We did this calculation to compare our method with previous research.<sup>1</sup>

Summary, (detailed calculation in the following)

| Product                                                                             | Eco-scale score                                           |             | Price for every 10 mmol product                           |             |
|-------------------------------------------------------------------------------------|-----------------------------------------------------------|-------------|-----------------------------------------------------------|-------------|
|                                                                                     | Previous research published by Lin et. al. <sup>[1]</sup> | Our process | Previous research published by Lin et. al. <sup>[1]</sup> | Our process |
|    | 43                                                        | 64          | \$52.7                                                    | \$19.3      |
|    | 58                                                        | 61.5        | \$129.3                                                   | \$30.1      |
|   | 52.5                                                      | 77.5        | \$210.3                                                   | \$45.2      |
|  | 51                                                        | 61          | \$281.4                                                   | \$77.1      |

|                                                                                   |      |      |           |         |
|-----------------------------------------------------------------------------------|------|------|-----------|---------|
| 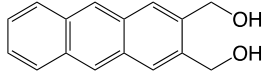 | 58.5 | 67.5 | \$441.6   | \$146.4 |
|  | 51.5 | 82.5 | \$601.1   | \$188.4 |
|  | 35.5 | 37   | \$1150.48 | \$955.7 |

From this form, we can see that, for every step, our process is more environment friendly based on Eco-scale point. And for every step to get same amount of product, our price is cheaper.

For the total seven steps to get Naphthacene-2,3-dicarboxylic acid diethyl ester

| Parameter                                                       | Previous research <sup>1</sup> |                                       | For our process |                                       |
|-----------------------------------------------------------------|--------------------------------|---------------------------------------|-----------------|---------------------------------------|
|                                                                 | Penalty points                 | Percentage in total penalty points(%) | Penalty points  | Percentage in total penalty points(%) |
| Yield                                                           | 73                             | 20.9                                  | 121             | 48                                    |
| Price of reaction components (to obtain 10 mmol of end product) | 70                             | 20                                    | 29              | 11.5                                  |
| Safety                                                          | 110                            | 31.4                                  | 40              | 15.9                                  |
| Technical set-up                                                | 14                             | 4                                     | 0               | 0                                     |
| Temperature/time                                                | 32                             | 9.1                                   | 3               | 1.2                                   |
| Workup and purification                                         | 51                             | 14.6                                  | 59              | 23.4                                  |
| Total penalty points                                            | 350                            |                                       | 252             |                                       |

For the previous research published by Lin et. al.<sup>1</sup>, Wittig reaction generating Naphthalene-2,3-dicarboxylic acid diethyl ester

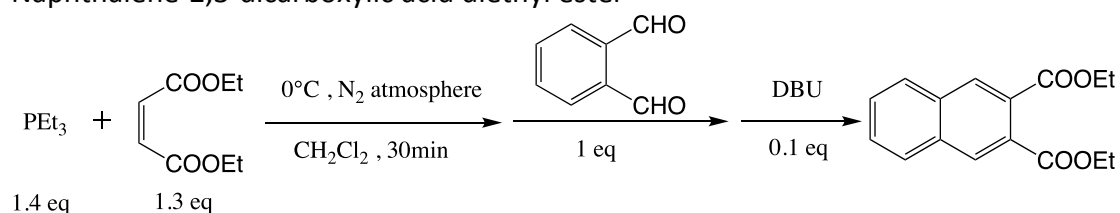

| Parameter                                                       | Item                                                                                      | Penalty points | Note |
|-----------------------------------------------------------------|-------------------------------------------------------------------------------------------|----------------|------|
| Yield                                                           | 86%                                                                                       | 7              |      |
| Price of reaction components (to obtain 10 mmol of end product) | 1,2-Phthalic dicarboxaldehyde                                                             | 3              |      |
|                                                                 | Triethylphosphine                                                                         | 3              |      |
|                                                                 | Diethyl maleate                                                                           | 0              |      |
|                                                                 | 1,8-Diazabicyclo[5.4.0]undec-7-ene 2,3,4,6,7,8,9,10-Octahydropyrimido[1,2-a]azepine (DBU) | 0              |      |
|                                                                 | Dichloromethane                                                                           | 0              |      |
|                                                                 | Water                                                                                     | 0              |      |

|                         |                                                                                           |    |                                   |
|-------------------------|-------------------------------------------------------------------------------------------|----|-----------------------------------|
| Safety                  | 1,2-Phthalic dicarboxaldehyde                                                             | 10 | dangerous for environment / toxic |
|                         | Triethylphosphine                                                                         | 5  | highly flammable                  |
|                         | Diethyl maleate                                                                           | 0  |                                   |
|                         | 1,8-Diazabicyclo[5.4.0]undec-7-ene 2,3,4,6,7,8,9,10-Octahydropyrimido[1,2-a]azepine (DBU) | 10 | dangerous for environment / toxic |
|                         | Dichloromethane                                                                           | 0  |                                   |
|                         | Water                                                                                     | 0  |                                   |
| Technical set-up        | Instruments for controlled addition of chemicals                                          | 1  | syringe used, drop wisely         |
|                         | (Inert) gas atmosphere                                                                    | 1  |                                   |
| Temperature/time        | Cooling to 0°C                                                                            | 4  |                                   |
| Workup and purification | Liquid-liquid extraction                                                                  | 3  |                                   |
|                         | Classical chromatography                                                                  | 10 |                                   |
| Eco-scale point         | 100-57=43                                                                                 |    |                                   |

For the previous research published by Lin et. al.<sup>1</sup>, reduction generating (3-Hydroxymethyl-naphthalen-2-yl)-methanol

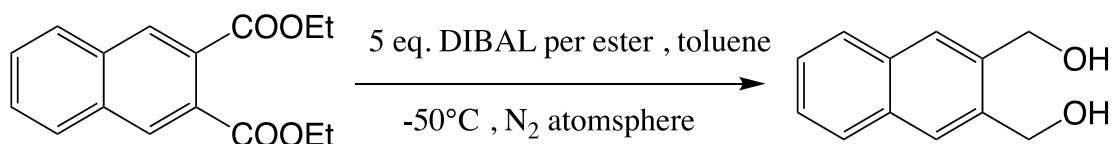

| Parameter                                                       | Item                                            | Penalty points | Note                                                             |
|-----------------------------------------------------------------|-------------------------------------------------|----------------|------------------------------------------------------------------|
| Yield                                                           | 86%                                             | 7              |                                                                  |
| Price of reaction components (to obtain 10 mmol of end product) | Naphthalene-2,3-dicarboxylic acid diethyl ester | 5              | Lab-made starting material, \$61.3 Based on previous calculation |
|                                                                 | DIBAL                                           | 5              |                                                                  |
| Safety                                                          | Naphthalene-2,3-dicarboxylic acid diethyl ester | 5              | Lab-made starting material, dangerous for environment.           |
|                                                                 | DIBAL                                           | 10             | Highly flammable, Toxic                                          |



|                         |                                                  |   |                           |
|-------------------------|--------------------------------------------------|---|---------------------------|
| Technical set-up        | Instruments for controlled addition of chemicals | 1 | syringe used, drop wisely |
|                         | (Inert) gas atmosphere                           | 1 |                           |
| Temperature/time        | Cooling, < 0°C                                   | 5 | -50°C used                |
| Workup and purification | Liquid-liquid extraction                         | 3 |                           |
| Eco-scale point         | 100-42=58                                        |   |                           |

For the previous research published by Lin et. al.<sup>1</sup>, oxidation generating Naphthalene-2,3-dicarbaldehyde

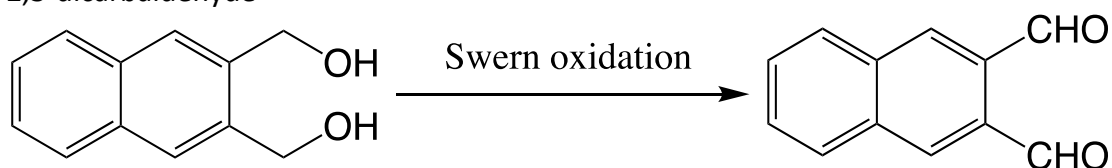

| Parameter                                                       | Item                                             | Penalty points | Note                                                              |
|-----------------------------------------------------------------|--------------------------------------------------|----------------|-------------------------------------------------------------------|
| Yield                                                           | 83%                                              | 8.5            |                                                                   |
| Price of reaction components (to obtain 10 mmol of end product) | 2,3-Bis(hydroxymethyl)naphthalene                | 5              | Lab-made starting material, \$114.8 Based on previous calculation |
|                                                                 | Oxalyl chloride                                  | 3              |                                                                   |
|                                                                 | DMSO                                             | 3              |                                                                   |
|                                                                 | Triethylamine                                    | 3              |                                                                   |
| Safety                                                          | 2,3-Bis(hydroxymethyl)naphthalene                | N/A            | Lab-made starting material, safety information not found          |
|                                                                 | Oxalyl chloride                                  | 5              | toxic                                                             |
|                                                                 | DMSO                                             | 0              |                                                                   |
|                                                                 | Triethylamine                                    | 10             | Highly flammable, toxic                                           |
| Technical set-up                                                | Instruments for controlled addition of chemicals | 1              | syringe used, drop wisely                                         |
|                                                                 | (Inert) gas atmosphere                           | 1              |                                                                   |
| Temperature/time                                                | Cooling, < 0°C                                   | 5              | -80°C used                                                        |
| Workup and purification                                         | Liquid-liquid extraction                         | 3              |                                                                   |
| Eco-scale point                                                 | 100-44.5=52.5                                    |                |                                                                   |

For the previous research published by Lin et. al.<sup>1</sup>, Wittig reaction generating Anthracene-2,3-dicarboxylic acid diethyl ester

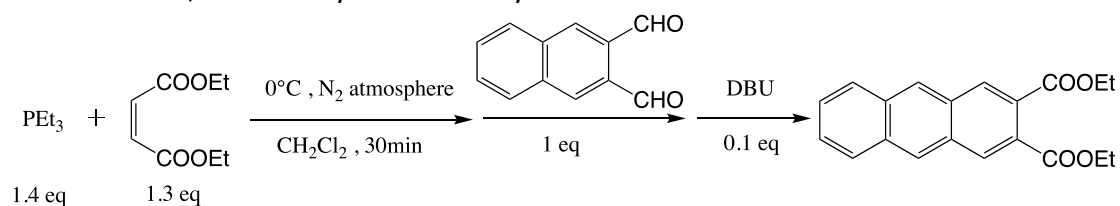

| Parameter                                                       | Item                                                                                      | Penalty points | Note                                                              |
|-----------------------------------------------------------------|-------------------------------------------------------------------------------------------|----------------|-------------------------------------------------------------------|
| Yield                                                           | 86%                                                                                       | 7              |                                                                   |
| Price of reaction components (to obtain 10 mmol of end product) | 2,3-Naphthalenedicarboxaldehyde                                                           | 5              | Lab-made starting material, \$244.5 Based on previous calculation |
|                                                                 | Triethylphosphine                                                                         | 3              |                                                                   |
|                                                                 | Diethyl maleate                                                                           | 0              |                                                                   |
|                                                                 | 1,8-Diazabicyclo[5.4.0]undec-7-ene 2,3,4,6,7,8,9,10-Octahydropyrimido[1,2-a]azepine (DBU) | 0              |                                                                   |
|                                                                 | Dichloromethane                                                                           | 0              |                                                                   |
|                                                                 | Water                                                                                     | 0              |                                                                   |
| Safety                                                          | 2,3-Naphthalenedicarboxaldehyde                                                           | 0              |                                                                   |
|                                                                 | Triethylphosphine                                                                         | 5              | highly flammable                                                  |
|                                                                 | Diethyl maleate                                                                           | 0              |                                                                   |
|                                                                 | 1,8-Diazabicyclo[5.4.0]undec-7-ene 2,3,4,6,7,8,9,10-Octahydropyrimido[1,2-a]azepine (DBU) | 10             | dangerous for environment / toxic                                 |
|                                                                 | Dichloromethane                                                                           | 0              |                                                                   |
|                                                                 | Water                                                                                     | 0              |                                                                   |
| Technical set-up                                                | Instruments for controlled addition of chemicals                                          | 1              | syringe used, dropwisely                                          |
|                                                                 | (Inert) gas atmosphere                                                                    | 1              |                                                                   |
| Temperature/time                                                | Cooling to 0°C                                                                            | 4              |                                                                   |
| Workup and                                                      | Liquid-liquid extraction                                                                  | 3              |                                                                   |

|                 |                          |    |  |
|-----------------|--------------------------|----|--|
| purification    |                          |    |  |
|                 | Classical chromatography | 10 |  |
| Eco-scale point | 100-49=51                |    |  |

For the previous research published by Lin et. al.<sup>1</sup>, reduction generating (3-Hydroxymethyl-anthracen-2-yl)-methanol

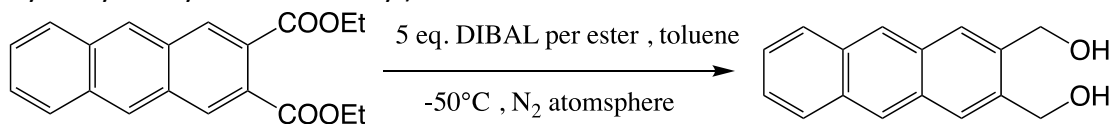

| Parameter                                                       | Item                                             | Penalty points | Note                                                              |
|-----------------------------------------------------------------|--------------------------------------------------|----------------|-------------------------------------------------------------------|
| Yield                                                           | 77%                                              | 11.5           |                                                                   |
| Price of reaction components (to obtain 10 mmol of end product) | Anthracene-2,3-dicarboxylic acid diethyl ester   | 5              | Lab-made starting material, \$303.6 Based on previous calculation |
|                                                                 | DIBAL                                            | 5              |                                                                   |
| Safety                                                          | Anthracene-2,3-dicarboxylic acid diethyl ester   | N/A            | Lab-made starting material, safety information not found          |
|                                                                 | DIBAL                                            | 10             | Highly flammable, Toxic                                           |
| Technical set-up                                                | Instruments for controlled addition of chemicals | 1              | syringe used, dropwisely                                          |
|                                                                 | (Inert) gas atmosphere                           | 1              |                                                                   |
| Temperature/time                                                | Cooling, < 0°C                                   | 5              | -50°C used                                                        |
| Workup and purification                                         | Liquid-liquid extraction                         | 3              |                                                                   |
| Eco-scale point                                                 | 100-41.5=58.5                                    |                |                                                                   |

For the previous research published by Lin et. al.<sup>1</sup>, oxidation generating Anthracene-2,3-dicarbaldehyde

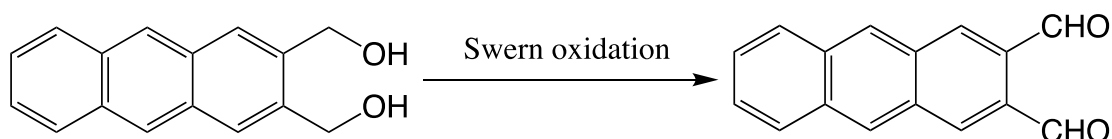

| Parameter | Item | Penalty points | Note |
|-----------|------|----------------|------|
| Yield     | 81%  | 9.5            |      |

|                                                                 |                                                  |     |                                                                   |
|-----------------------------------------------------------------|--------------------------------------------------|-----|-------------------------------------------------------------------|
| Price of reaction components (to obtain 10 mmol of end product) | 2,3-Bis(hydroxymethyl)naphthalene                | 5   | Lab-made starting material, \$545.2 Based on previous calculation |
|                                                                 | Oxalyl chloride                                  | 3   |                                                                   |
|                                                                 | DMSO                                             | 3   |                                                                   |
|                                                                 | Triethylamine                                    | 3   |                                                                   |
| Safety                                                          | 2,3-Bis(hydroxymethyl)naphthalene                | N/A | Lab-made starting material, safety information not found          |
|                                                                 | Oxalyl chloride                                  | 5   | toxic                                                             |
|                                                                 | DMSO                                             | 0   |                                                                   |
|                                                                 | Triethylamine                                    | 10  | Highly flammable, toxic                                           |
| Technical set-up                                                | Instruments for controlled addition of chemicals | 1   | syringe used, drop wisely                                         |
|                                                                 | (Inert) gas atmosphere                           | 1   |                                                                   |
| Temperature/time                                                | Cooling, < 0°C                                   | 5   | -80°C used                                                        |
| Workup and purification                                         | Liquid-liquid extraction                         | 3   |                                                                   |
| Eco-scale point                                                 | 100-48.5=51.5                                    |     |                                                                   |

For the previous research published by Lin et. al.<sup>1</sup>, Wittig reaction generating Naphthalene-2,3-dicarboxylic acid diethyl ester

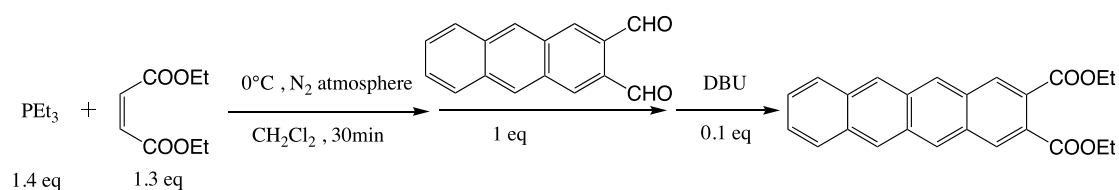

| Parameter                                                       | Item                                                                       | Penalty points | Note                                                               |
|-----------------------------------------------------------------|----------------------------------------------------------------------------|----------------|--------------------------------------------------------------------|
| Yield                                                           | 55%                                                                        | 22.5           |                                                                    |
| Price of reaction components (to obtain 10 mmol of end product) | Anthracene-2,3-dicarbaldehyde                                              | 5              | Lab-made starting material, \$1092.9 Based on previous calculation |
|                                                                 | Triethylphosphine                                                          | 3              |                                                                    |
|                                                                 | Diethyl maleate                                                            | 0              |                                                                    |
|                                                                 | 1,8-Diazabicyclo[5.4.0]undec-7-ene 2,3,4,6,7,8,9,10-Octahydropyrimido[1,2- | 0              |                                                                    |

|                         |                                                                                           |     |                                                          |
|-------------------------|-------------------------------------------------------------------------------------------|-----|----------------------------------------------------------|
|                         | a]azepine (DBU)                                                                           |     |                                                          |
|                         | Dichloromethane                                                                           | 0   |                                                          |
|                         | Water                                                                                     | 0   |                                                          |
| Safety                  | Anthracene-2,3-dicarbaldehyde                                                             | N/A | Lab-made starting material, safety information not found |
|                         | Triethylphosphine                                                                         | 5   | highly flammable                                         |
|                         | Diethyl maleate                                                                           | 0   |                                                          |
|                         | 1,8-Diazabicyclo[5.4.0]undec-7-ene 2,3,4,6,7,8,9,10-Octahydropyrimido[1,2-a]azepine (DBU) | 10  | dangerous for environment / toxic                        |
|                         | Dichloromethane                                                                           | 0   |                                                          |
|                         | Water                                                                                     | 0   |                                                          |
| Technical set-up        | Instruments for controlled addition of chemicals                                          | 1   | syringe used, dropwisely                                 |
|                         | (Inert) gas atmosphere                                                                    | 1   |                                                          |
| Temperature/time        | Cooling to 0°C                                                                            | 4   |                                                          |
| Workup and purification | Liquid-liquid extraction                                                                  | 3   |                                                          |
|                         | Classical chromatography                                                                  | 10  |                                                          |
| Eco-scale point         | 100-64.5=35.5                                                                             |     |                                                          |

For our process, Wittig reaction generating Naphthalene-2,3-dicarboxylic acid diethyl ester

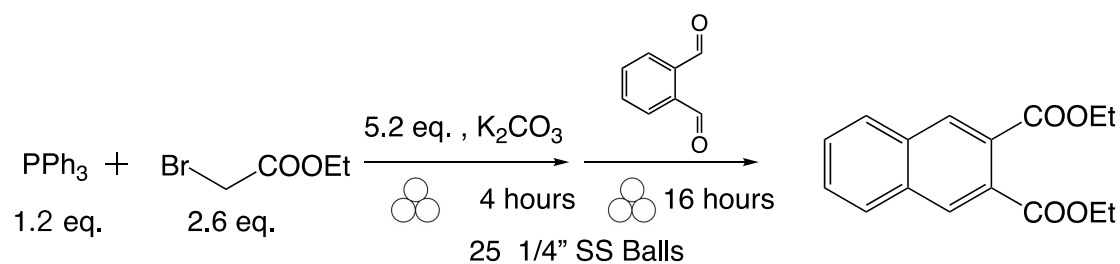

| Parameter                                                       | Item                          | Penalty points | Note                              |
|-----------------------------------------------------------------|-------------------------------|----------------|-----------------------------------|
| Yield                                                           | 84%                           | 8              |                                   |
| Price of reaction components (to obtain 10 mmol of end product) | 1,2-Phthalic dicarboxaldehyde | 3              |                                   |
|                                                                 | Triphenyl phosphine           | 0              |                                   |
|                                                                 | Ethyl bromoacetate            | 0              |                                   |
|                                                                 | Potassium carbonate           | 0              |                                   |
| Safety                                                          | 1,2-Phthalic dicarboxaldehyde | 10             | dangerous for environment / toxic |
|                                                                 | Triphenyl phosphine           | 0              |                                   |
|                                                                 | Ethyl bromoacetate            | 5              | toxic                             |
|                                                                 | Potassium carbonate           | 0              |                                   |
| Technical set-up                                                | Common setup                  | 0              |                                   |
| Temperature/time                                                | Room temperature, < 24 h      | 0              |                                   |
| Workup and purification                                         | Simple filtration             | 0              |                                   |
|                                                                 | Classical chromatography      | 10             |                                   |
| Eco-scale point                                                 | 100-36=64                     |                |                                   |

For our process, Reduction generating (3-Hydroxymethyl-naphthalen-2-yl)-methanol

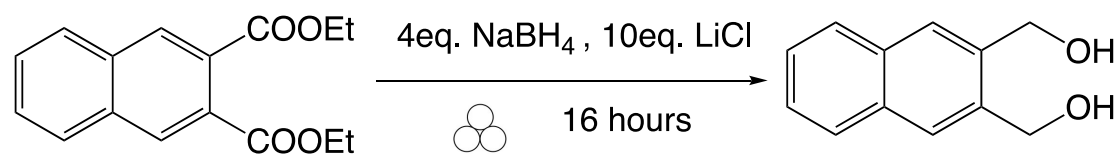

| Parameter | Item | Penalty points | Note |
|-----------|------|----------------|------|
|           |      |                |      |

|                                                                 |                                                 |      |                                                                     |
|-----------------------------------------------------------------|-------------------------------------------------|------|---------------------------------------------------------------------|
| Yield                                                           | 75%                                             | 12.5 |                                                                     |
| Price of reaction components (to obtain 10 mmol of end product) | Naphthalene-2,3-dicarboxylic acid diethyl ester | 3    | Lab-made starting material, \$25.7<br>Based on previous calculation |
|                                                                 | Sodium borohydride                              | 0    |                                                                     |
|                                                                 | Lithium chloride                                | 0    |                                                                     |
| Safety                                                          | Naphthalene-2,3-dicarboxylic acid diethyl ester | 5    | Lab-made starting material, dangerous for environment.              |
|                                                                 | Sodium borohydride                              | 5    | Toxic                                                               |
|                                                                 | Lithium chloride                                | 0    |                                                                     |
| Technical set-up                                                | Common setup                                    | 0    |                                                                     |
| Temperature/time                                                | Room temperature, < 24 h                        | 0    |                                                                     |
| Workup and purification                                         | Liquid-liquid extraction                        | 3    |                                                                     |
|                                                                 | Classical chromatography                        | 10   |                                                                     |
| Eco-scale point                                                 | 100-38.5=61.5                                   |      |                                                                     |

For our process, Oxidation generating Naphthalene-2,3-dicarbaldehyde

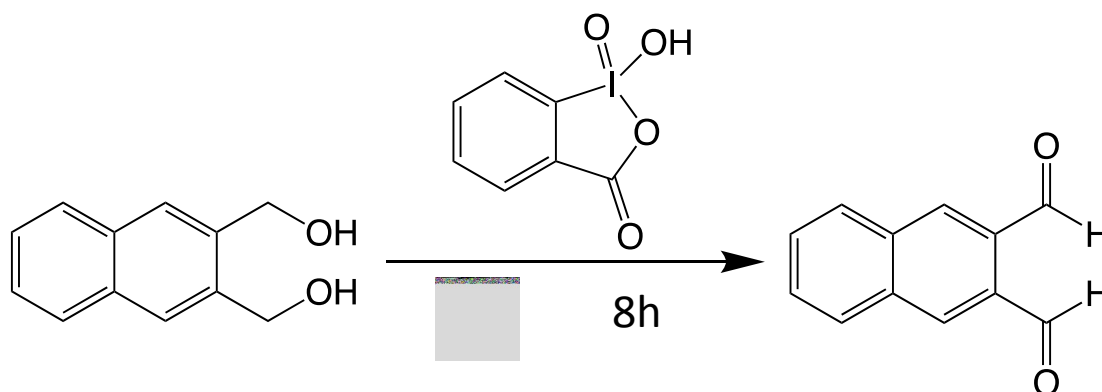

| Parameter                                                       | Item                              | Penalty points | Note                                                                |
|-----------------------------------------------------------------|-----------------------------------|----------------|---------------------------------------------------------------------|
| Yield                                                           | 81%                               | 9.5            |                                                                     |
| Price of reaction components (to obtain 10 mmol of end product) | 2,3-Bis(hydroxymethyl)naphthalene | 3              | Lab-made starting material, \$37.5<br>Based on previous calculation |

|                         |                                   |     |                                                               |
|-------------------------|-----------------------------------|-----|---------------------------------------------------------------|
|                         | IBX                               | 0   | Lab-made starting material, \$7.7 based on preparation method |
| Safety                  | 2,3-Bis(hydroxymethyl)naphthalene | N/A | Lab-made starting material, safety information not found      |
|                         | IBX                               | 0   |                                                               |
| Technical set-up        | Common setup                      | 0   |                                                               |
| Temperature/time        | Room temperature, < 24 h          | 0   |                                                               |
| Workup and purification | Classical chromatography          | 10  |                                                               |
| Eco-scale point         | 100-22.5=77.5                     |     |                                                               |

For our process, Wittig reaction generating Anthracene-2,3-dicarboxylic acid diethyl ester

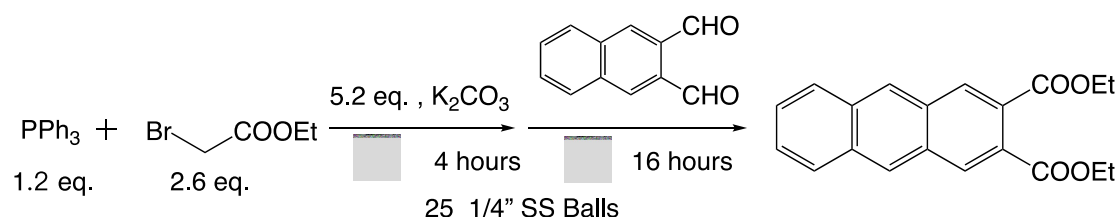

| Parameter                                                       | Item                            | Penalty points | Note                                                             |
|-----------------------------------------------------------------|---------------------------------|----------------|------------------------------------------------------------------|
| Yield                                                           | 62%                             | 19             |                                                                  |
| Price of reaction components (to obtain 10 mmol of end product) | 2,3-Naphthalenedicarboxaldehyde | 5              | Lab-made starting material, \$72.9 Based on previous calculation |
|                                                                 | Triphenyl phosphine             | 0              |                                                                  |
|                                                                 | Ethyl bromoacetate              | 0              |                                                                  |
|                                                                 | Potassium carbonate             | 0              |                                                                  |
| Safety                                                          | 2,3-Naphthalenedicarboxaldehyde | 0              |                                                                  |
|                                                                 | Triphenyl phosphine             | 0              |                                                                  |
|                                                                 | Ethyl bromoacetate              | 5              | toxic                                                            |
|                                                                 | Potassium carbonate             | 0              |                                                                  |



|                         |                          |    |  |
|-------------------------|--------------------------|----|--|
| Technical set-up        | Common setup             | 0  |  |
| Temperature/time        | Room temperature, < 24 h | 0  |  |
| Workup and purification | Simple filtration        | 0  |  |
|                         | Classical chromatography | 10 |  |
| Eco-scale point         | 100-39=61                |    |  |

For our process, Reduction generating (3-Hydroxymethyl-anthracen-2-yl)-methanol

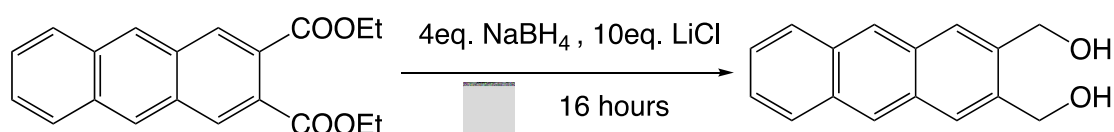

| Parameter                                                       | Item                                           | Penalty points | Note                                                              |
|-----------------------------------------------------------------|------------------------------------------------|----------------|-------------------------------------------------------------------|
| Yield                                                           | 55%                                            | 22.5           |                                                                   |
| Price of reaction components (to obtain 10 mmol of end product) | Anthracene-2,3-dicarboxylic acid diethyl ester | 5              | Lab-made starting material, \$140.2 Based on previous calculation |
|                                                                 | Sodium borohydride                             | 0              |                                                                   |
|                                                                 | Lithium chloride                               | 0              |                                                                   |
| Safety                                                          | Anthracene-2,3-dicarboxylic acid diethyl ester | N/A            | Lab-made starting material, safety information not found          |
|                                                                 | Sodium borohydride                             | 5              | Toxic                                                             |
|                                                                 | Lithium chloride                               | 0              |                                                                   |
| Technical set-up                                                | Common setup                                   | 0              |                                                                   |
| Temperature/time                                                | Room temperature, < 24 h                       | 0              |                                                                   |
| Workup and purification                                         | Simple filtration                              | 0              |                                                                   |
| Eco-scale point                                                 | 100-41.5=67.5                                  |                |                                                                   |

For our process, Oxidation generating Anthracene-2,3-dicarbaldehyde

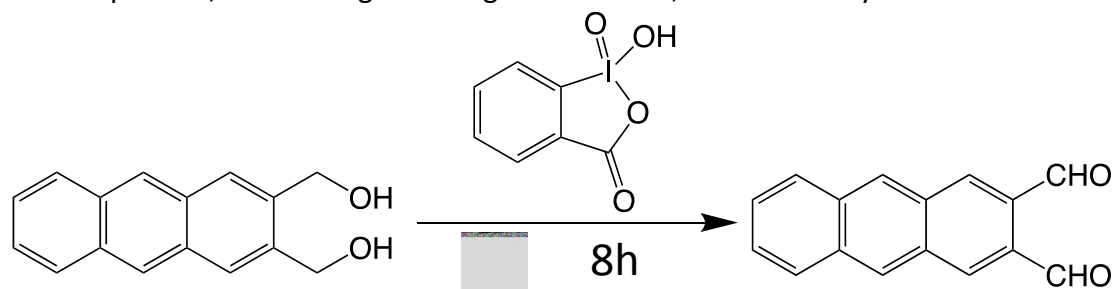

| Parameter                                                       | Item                              | Penalty points | Note                                                              |
|-----------------------------------------------------------------|-----------------------------------|----------------|-------------------------------------------------------------------|
| Yield                                                           | 81%                               | 9.5            |                                                                   |
| Price of reaction components (to obtain 10 mmol of end product) | 2,3-Bis(hydroxymethyl)naphthalene | 5              | Lab-made starting material, \$180.7 Based on previous calculation |
|                                                                 | IBX                               | 0              | Lab-made starting material, \$7.7 based on preparation method     |
| Safety                                                          | 2,3-Bis(hydroxymethyl)naphthalene | N/A            | Lab-made starting material, safety information not found          |
|                                                                 | IBX                               | 0              |                                                                   |
| Technical set-up                                                | Common setup                      | 0              |                                                                   |
| Temperature/time                                                | Room temperature, < 24 h          | 0              |                                                                   |
| Workup and purification                                         | Simple filtration                 | 0              |                                                                   |
|                                                                 | Sublimation                       | 3              |                                                                   |
| Eco-scale point                                                 | 100-17.5=82.5                     |                |                                                                   |

For our process, Wittig reaction generating Naphthalene-2,3-dicarboxylic acid diethyl ester

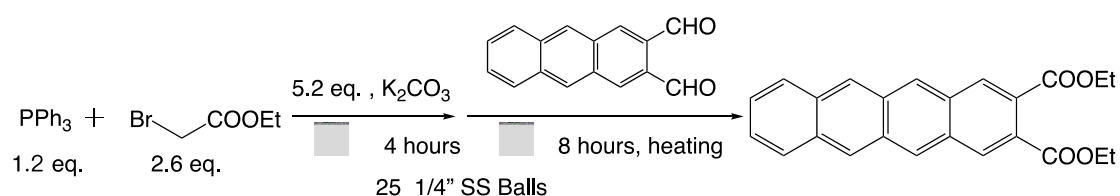

| Parameter                                                       | Item                            | Penalty points | Note                                                            |
|-----------------------------------------------------------------|---------------------------------|----------------|-----------------------------------------------------------------|
| Yield                                                           | 20%                             | 40             |                                                                 |
| Price of reaction components (to obtain 10 mmol of end product) | 2,3-Naphthalenedicarboxaldehyde | 5              | Lab-made starting material, \$942 Based on previous calculation |
|                                                                 | Triphenyl phosphine             | 0              |                                                                 |
|                                                                 | Ethyl bromoacetate              | 0              |                                                                 |
|                                                                 | Potassium carbonate             | 0              |                                                                 |

|                         |                                 |     |                                                          |
|-------------------------|---------------------------------|-----|----------------------------------------------------------|
| Safety                  | 2,3-Naphthalenedicarboxaldehyde | N/A | Lab-made starting material, safety information not found |
|                         | Triphenyl phosphine             | 0   |                                                          |
|                         | Ethyl bromoacetate              | 5   | toxic                                                    |
|                         | Potassium carbonate             | 0   |                                                          |
| Technical set-up        | Common setup                    | 0   |                                                          |
| Temperature/time        | Heating, > 1 h                  | 3   |                                                          |
| Workup and purification | Simple filtration               | 0   |                                                          |
|                         | Classical chromatography        | 10  |                                                          |
| Eco-scale point         | 100-63=37                       |     |                                                          |

#### Reference

1. Lin, C.; Lin, K.; Pal, B.; Tsouz, L., *Chem. Commun.*, **2009**, 803-805
2. Angus, R.O.; Johnson, R. P., *J. Org. Chem.*, **1983**, *48*, 273-276
3. Wilcox, C. F. Jr.; Weber, K. A., *J. Org. Chem.*, **1986**, *51*, 1088-1095
4. Achar, T. K.; Maiti, S.; Mal, P. *RSC Adv.*, **2014**, *4*, 12834-12839
5. Firouzabadi, H.; Mostafavipoor, Z., *Bull. Chem. Soc. Jpn.*, **1983**, *56*, 914-917
6. Mallouli, A., Lepage, Y., *Synthesis*, **1980**, *9*, 689
7. Andersen, J.; Mack, J. *Chemical Science* **2017**, *8*, 5447-5453
8. K. Van Aken, L. Strekowski and L. Patiny, *Beilstein J. Org. Chem.*, **2006**, *2*, No. 3, No pp. given.
